# Supplementary material for: Electrocatalytic reduction of dioxygen by Mn(iii)meso-tetra(N-methylpyridinium-4-yl)porphyrin in universal buffer
Source: Royal Society of Chemistry journal article supplement (doi:10.1039/c9dt01436e), 2019-01-01
Supplement: c9dt01436e1.pdf [file c9dt01436e1.pdf]

Electrocatalytic reduction of dioxygen by Mn(III)  
*meso*-Tetra(*N*-methylpyridinium-4-yl) porphyrin in  
universal buffer

Supporting Information

*Lauren E. Lieske, Shelby L. Hooe, Asa W. Nichols, and Charles W. Machan\**

\* - machan@virginia.edu; ORCID 0000-0002-5182-1138

Department of Chemistry, University of Virginia, McCormick Road, P.O. Box 400319,

Charlottesville, VA, 22904-4319, United States

**Table S1.** Solutions utilized in this study.

| pH Range | Solution                                    |
|----------|---------------------------------------------|
| 1        | 1 M HCl and 0.1 M NaCl                      |
| 2-13     | 0.04 M Britton-Robinson Buffer <sup>1</sup> |
| 14       | 1 M KOH and 0.1 M NaCl                      |

**Table S2.** Electrochemical characterization of the Mn(III)/(II) reduction in a pH 1 solution (1 M HCl /0.1 M NaCl) under Ar saturation conditions as the scan rate is increased.

| Scan Rate (V s <sup>-1</sup> ) | E <sub>1/2</sub> vs. NHE (V) | ΔE vs. NHE (mV) | <i>i</i> <sub>pc</sub> / <i>i</i> <sub>pa</sub> |
|--------------------------------|------------------------------|-----------------|-------------------------------------------------|
| 0.1                            | +0.09                        | 299             | 1.60                                            |
| 0.2                            | +0.08                        | 326             | 1.50                                            |
| 0.3                            | +0.07                        | 342             | 1.60                                            |
| 0.5                            | +0.06                        | 371             | 1.80                                            |
| 1.0                            | +0.04                        | 453             | 1.80                                            |

**Table S3.** Electrochemical characterization of the Mn(III)/(II) reduction in pH 3 Britton-Robinson Buffer solution under Ar saturation conditions as the scan rate is increased.

| Scan Rate (V s <sup>-1</sup> ) | E <sub>1/2</sub> vs. NHE (V) | ΔE vs. NHE (mV) | <i>i</i> <sub>pc</sub> / <i>i</i> <sub>pa</sub> |
|--------------------------------|------------------------------|-----------------|-------------------------------------------------|
| 0.1                            | 0.00                         | 226             | 1.10                                            |
| 0.2                            | +0.01                        | 292             | 1.20                                            |
| 0.3                            | 0.00                         | 318             | 1.20                                            |
| 0.5                            | 0.00                         | 368             | 1.20                                            |
| 1.0                            | 0.00                         | 412             | 1.20                                            |

**Table S4.** Electrochemical characterization of the Mn(III)/(II) reduction in pH 4 Britton-Robinson Buffer solution under Ar saturation conditions as the scan rate is increased.

| Scan Rate (V s <sup>-1</sup> ) | E <sub>1/2</sub> vs. NHE (V) | ΔE vs. NHE (mV) | <i>i</i> <sub>pc</sub> / <i>i</i> <sub>pa</sub> |
|--------------------------------|------------------------------|-----------------|-------------------------------------------------|
| 0.1                            | 0.00                         | 238             | 0.99                                            |
| 0.2                            | 0.00                         | 280             | 1.03                                            |
| 0.3                            | −0.01                        | 324             | 1.10                                            |
| 0.5                            | −0.02                        | 352             | 1.12                                            |
| 1.0                            | −0.03                        | 415             | 1.26                                            |

**Table S5.** Electrochemical characterization of the Mn(III)/(II) reduction in pH 5 Britton-Robinson Buffer solution under Ar saturation conditions as the scan rate is increased.

| Scan Rate (V s <sup>-1</sup> ) | E <sub>1/2</sub> vs. NHE (V) | ΔE vs. NHE (mV) | <i>i</i> <sub>pc</sub> / <i>i</i> <sub>pa</sub> |
|--------------------------------|------------------------------|-----------------|-------------------------------------------------|
| 0.1                            | +0.02                        | 167             | 0.92                                            |
| 0.2                            | +0.02                        | 193             | 0.95                                            |
| 0.3                            | +0.02                        | 215             | 0.95                                            |
| 0.5                            | +0.01                        | 246             | 1.00                                            |
| 1.0                            | +0.01                        | 290             | 1.05                                            |

**Table S6.** Electrochemical characterization of the Mn(III)/(II) reduction in pH 6 Britton-Robinson Buffer solution under Ar saturation conditions as the scan rate is increased.

| Scan Rate (V s <sup>-1</sup> ) | E <sub>1/2</sub> vs. NHE (V) | ΔE vs. NHE (mV) | <i>i</i> <sub>pc</sub> / <i>i</i> <sub>pa</sub> |
|--------------------------------|------------------------------|-----------------|-------------------------------------------------|
| 0.1                            | +0.02                        | 132             | 1.10                                            |
| 0.2                            | +0.02                        | 156             | 1.05                                            |
| 0.3                            | +0.02                        | 165             | 1.05                                            |
| 0.5                            | +0.02                        | 189             | 1.05                                            |
| 1.0                            | +0.01                        | 237             | 1.05                                            |

**Table S7.** Electrochemical characterization of the Mn(III)/(II) reduction in pH 7 Britton-Robinson Buffer solution under Ar saturation conditions as the scan rate is increased.

| Scan Rate (V s <sup>-1</sup> ) | E <sub>1/2</sub> vs. NHE (V) | ΔE vs. NHE (mV) | <i>i</i> <sub>pc</sub> / <i>i</i> <sub>pa</sub> |
|--------------------------------|------------------------------|-----------------|-------------------------------------------------|
| 0.1                            | +0.02                        | 114             | 0.92                                            |
| 0.2                            | +0.02                        | 120             | 0.92                                            |
| 0.3                            | +0.02                        | 134             | 0.88                                            |
| 0.5                            | +0.02                        | 146             | 0.89                                            |
| 1.0                            | +0.01                        | 170             | 0.92                                            |

**Table S8.** Electrochemical characterization of the Mn(III)/(II) reduction in pH 8 Britton-Robinson Buffer solution under Ar saturation conditions as the scan rate is increased.

| Scan Rate (V s <sup>-1</sup> ) | E <sub>1/2</sub> vs. NHE (V) | ΔE vs. NHE (mV) | <i>i</i> <sub>pc</sub> / <i>i</i> <sub>pa</sub> |
|--------------------------------|------------------------------|-----------------|-------------------------------------------------|
| 0.1                            | +0.02                        | 86              | 1.01                                            |
| 0.2                            | +0.02                        | 94              | 1.01                                            |
| 0.3                            | +0.02                        | 95              | 0.98                                            |
| 0.5                            | +0.02                        | 103             | 1.00                                            |
| 1.0                            | +0.02                        | 119             | 1.03                                            |

**Table S9.** Electrochemical characterization of the Mn(III)/(II) reduction in pH 9 Britton-Robinson Buffer solution under Ar saturation conditions as the scan rate is increased.

| Scan Rate (V s <sup>-1</sup> ) | E <sub>1/2</sub> vs. NHE (V) | ΔE vs. NHE (mV) | <i>i</i> <sub>pc</sub> / <i>i</i> <sub>pa</sub> |
|--------------------------------|------------------------------|-----------------|-------------------------------------------------|
| 0.1                            | +0.02                        | 110             | 0.99                                            |
| 0.2                            | +0.02                        | 126             | 0.98                                            |
| 0.3                            | +0.02                        | 139             | 0.99                                            |
| 0.5                            | +0.02                        | 155             | 1.00                                            |
| 1.0                            | +0.01                        | 186             | 1.03                                            |



**Table S10.** Electrochemical characterization of the Mn(III)/(II) reduction in pH 10 Britton-Robinson Buffer solution under Ar saturation conditions as the scan rate is increased.

| Scan Rate (V s <sup>-1</sup> ) | E <sub>1/2</sub> vs. NHE (V) | ΔE vs. NHE (mV) | <i>i</i> <sub>pc</sub> / <i>i</i> <sub>pa</sub> |
|--------------------------------|------------------------------|-----------------|-------------------------------------------------|
| 0.1                            | +0.02                        | 84              | 0.95                                            |
| 0.2                            | +0.02                        | 94              | 0.97                                            |
| 0.3                            | +0.02                        | 97              | 0.96                                            |
| 0.5                            | +0.02                        | 105             | 0.96                                            |
| 1.0                            | +0.02                        | 112             | 0.99                                            |

**Table S11.** Electrochemical characterization of the Mn(III)/(II) reduction in pH 11 Britton-Robinson Buffer solution under Ar saturation conditions as the scan rate is increased.

| Scan Rate (V s <sup>-1</sup> ) | E <sub>1/2</sub> vs. NHE (V) | ΔE vs. NHE (mV) | <i>i</i> <sub>pc</sub> / <i>i</i> <sub>pa</sub> |
|--------------------------------|------------------------------|-----------------|-------------------------------------------------|
| 0.1                            | +0.01                        | 75              | 1.10                                            |
| 0.2                            | +0.01                        | 82              | 0.99                                            |
| 0.3                            | +0.01                        | 88              | 1.00                                            |
| 0.5                            | +0.01                        | 97              | 0.97                                            |
| 1.0                            | +0.01                        | 107             | 0.94                                            |

**Table S12.** Electrochemical characterization of the Mn(III)/(II) reduction in pH 12 Britton-Robinson Buffer solution under Ar saturation conditions as the scan rate is increased.

| Scan Rate (V s <sup>-1</sup> ) | E <sub>1/2</sub> vs. NHE (V) | ΔE vs. NHE (mV) | <i>i</i> <sub>pc</sub> / <i>i</i> <sub>pa</sub> |
|--------------------------------|------------------------------|-----------------|-------------------------------------------------|
| 0.1                            | −0.02                        | 77              | 1.30                                            |
| 0.2                            | −0.03                        | 86              | 1.31                                            |
| 0.3                            | −0.03                        | 91              | 1.22                                            |
| 0.5                            | −0.03                        | 100             | 1.17                                            |
| 1.0                            | −0.02                        | 107             | 1.09                                            |

**Table S13** Electrochemical characterization of the Mn(III)/(II) reduction in pH 13 Britton-Robinson Buffer solution under Ar saturation conditions as the scan rate is increased.

| Scan Rate (V s <sup>-1</sup> ) | E <sub>1/2</sub> vs. NHE (V) | ΔE vs. NHE (mV) | <i>i</i> <sub>pc</sub> / <i>i</i> <sub>pa</sub> |
|--------------------------------|------------------------------|-----------------|-------------------------------------------------|
| 0.1                            | −0.05                        | 125             | 1.08                                            |
| 0.2                            | −0.07                        | 126             | 1.06                                            |
| 0.3                            | −0.08                        | 128             | 1.02                                            |
| 0.5                            | −0.08                        | 129             | 1.06                                            |
| 1.0                            | −0.08                        | 130             | 1.04                                            |

**Table S14.** Electrochemical characterization of the Mn(III)/(II) reduction in pH 14 Britton-Robinson Buffer solution under Ar saturation conditions as the scan rate is increased.

| Scan Rate (V s <sup>-1</sup> ) | E <sub>1/2</sub> vs. NHE (V) | ΔE vs. NHE (mV) | <i>i</i> <sub>pc</sub> / <i>i</i> <sub>pa</sub> |
|--------------------------------|------------------------------|-----------------|-------------------------------------------------|
| 0.1                            | −0.11                        | 223             | 1.14                                            |
| 0.2                            | −0.12                        | 235             | 1.15                                            |
| 0.3                            | −0.12                        | 244             | 1.19                                            |
| 0.5                            | −0.12                        | 254             | 1.25                                            |
| 1.0                            | −0.12                        | 249             | 1.40                                            |

**Table S15.** Electrochemical characterization of Mn(IV)/(III) feature from pH 10-14, CVs taken at a scan rate of 100 mV/s under Ar saturation conditions.

| pH | E <sub>1/2</sub> vs. NHE (V) | ΔE vs. NHE (mV) | <i>i</i> <sub>pc</sub> / <i>i</i> <sub>pa</sub> |
|----|------------------------------|-----------------|-------------------------------------------------|
| 10 | +0.65                        | 250             | 0.81                                            |
| 11 | +0.53                        | 110             | 1.08                                            |
| 12 | +0.39                        | 70              | 1.05                                            |
| 13 | +0.32                        | 70              | 1.00                                            |
| 14 | +0.24                        | 120             | 1.15                                            |

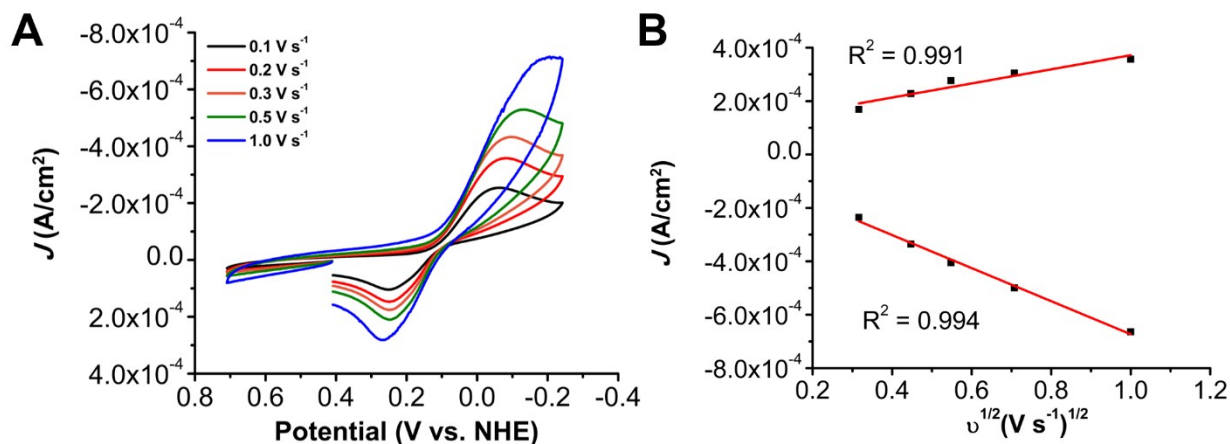

**Figure S1. (A)** Variable scan rate CVs **(B)** Linear fit demonstrating a homogenous response of  $[\text{Mn}(\text{TMPyP})\text{Cl}]^{4+}$ . Conditions: 1 mM  $[\text{Mn}(\text{TMPyP})\text{Cl}]^{4+}$  in a pH 1 (1 M HCl /0.1 M NaCl) solution under Ar saturation conditions, glassy carbon working electrode, glassy carbon counter electrode, 3.0 M NaCl Ag/AgCl reference electrode; varied scan rate.

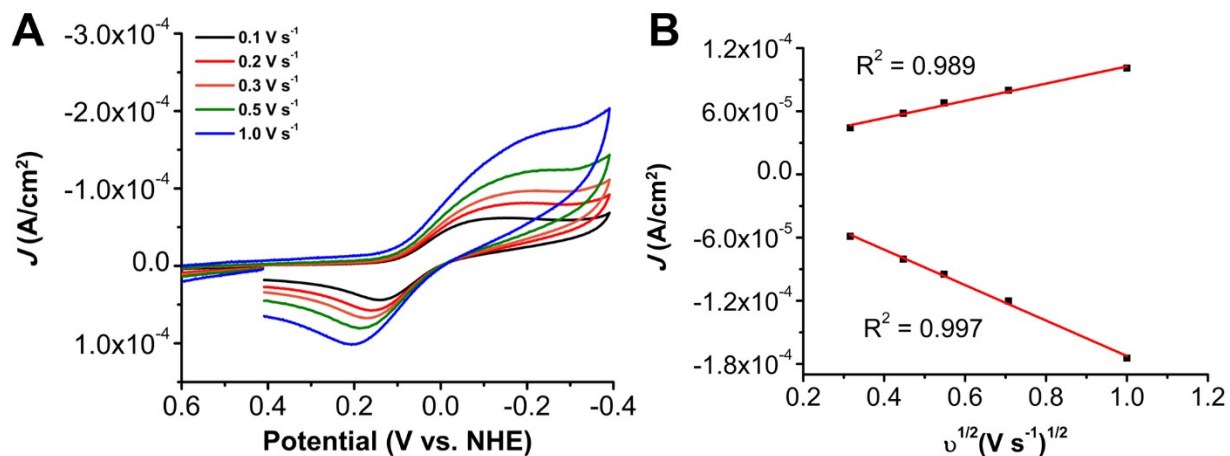

**Figure S2. (A)** Variable scan rate CVs **(B)** Linear fit demonstrating a homogenous response of  $[\text{Mn}(\text{TMPyP})\text{Cl}]^{4+}$ . Conditions: 1 mM  $[\text{Mn}(\text{TMPyP})\text{Cl}]^{4+}$  in a pH 3 Britton-Robinson Buffer solution under Ar saturation conditions, glassy carbon working electrode, glassy carbon counter electrode, 3.0 M NaCl Ag/AgCl reference electrode; varied scan rate.

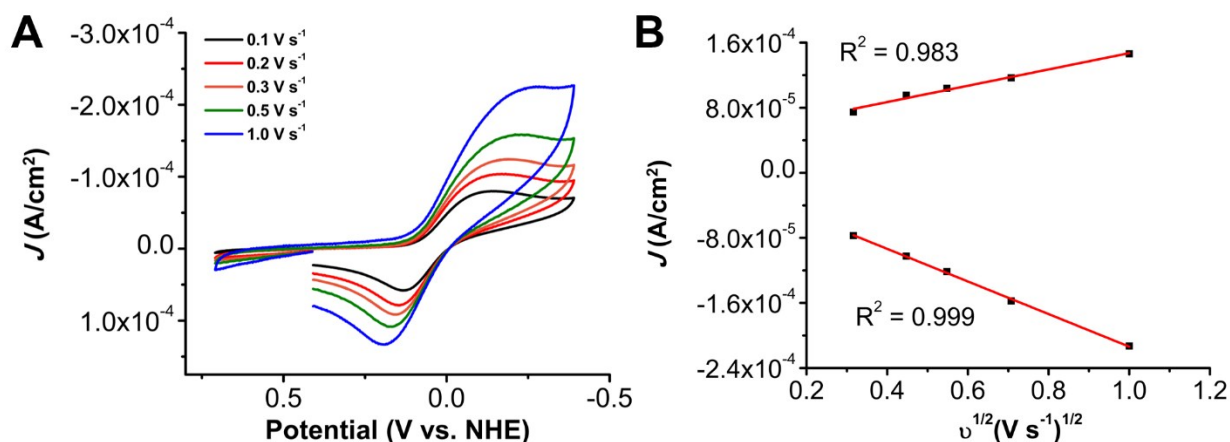

**Figure S3. (A)** Variable scan rate CVs **(B)** Linear fit demonstrating a homogenous response of  $[\text{Mn}(\text{TMPyP})\text{Cl}]^{4+}$ . Conditions: 1 mM  $[\text{Mn}(\text{TMPyP})\text{Cl}]^{4+}$  in a pH 4 Britton-Robinson Buffer solution under Ar saturation conditions, glassy carbon working electrode, glassy carbon counter electrode, 3.0 M NaCl Ag/AgCl; varied scan rate.

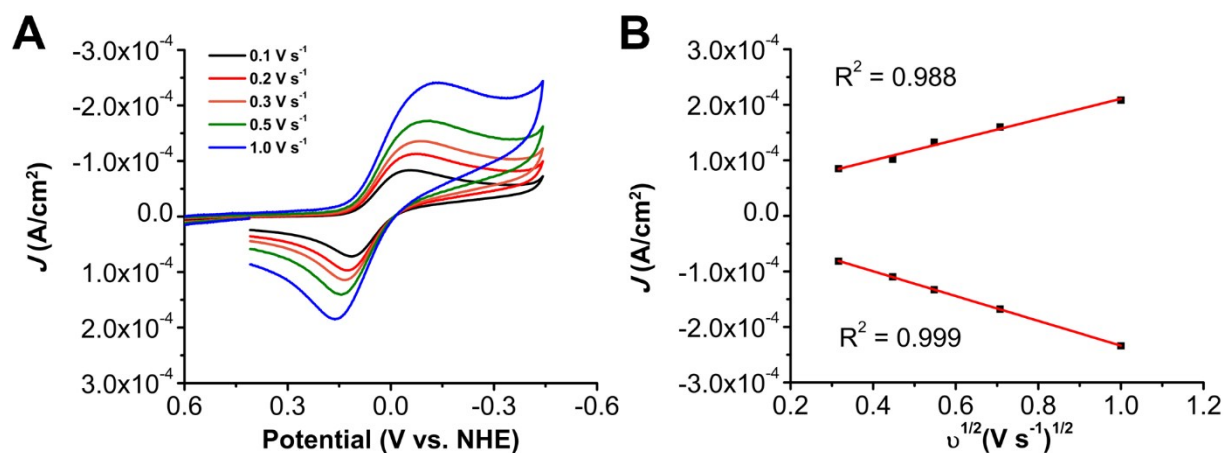

**Figure S4. (A)** Variable scan rate CVs **(B)** Linear fit demonstrating a homogenous response of  $[\text{Mn}(\text{TMPyP})\text{Cl}]^{4+}$ . Conditions: 1 mM  $[\text{Mn}(\text{TMPyP})\text{Cl}]^{4+}$  in a pH 5 Britton-Robinson Buffer solution under Ar saturation conditions, glassy carbon working electrode, glassy carbon counter electrode, 3.0 M NaCl Ag/AgCl reference electrode; varied scan rate.

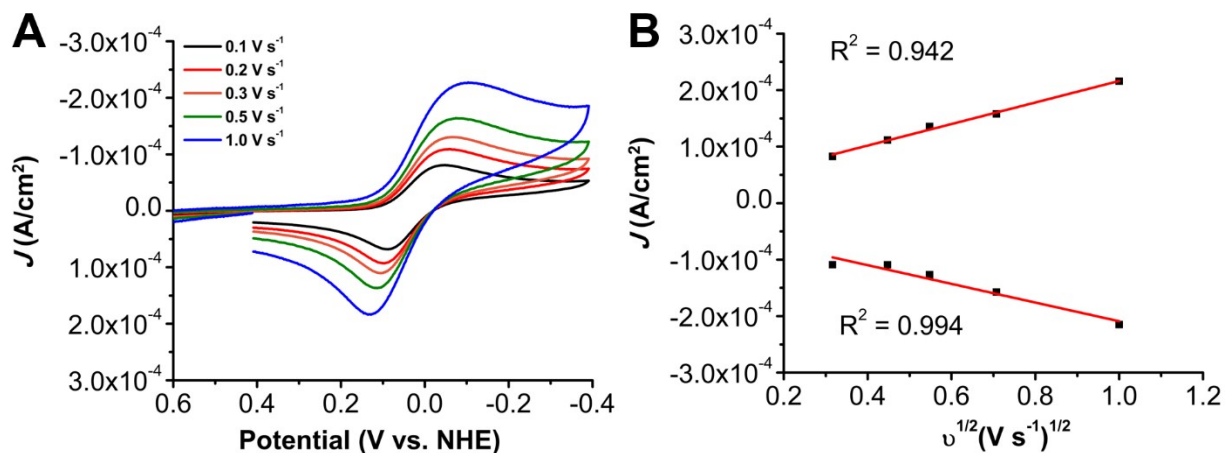

**Figure S5. (A)** Variable scan rate CVs **(B)** Linear fit demonstrating a homogenous response of  $[\text{Mn}(\text{TMPyP})\text{Cl}]^{4+}$ . Conditions: 1 mM  $[\text{Mn}(\text{TMPyP})\text{Cl}]^{4+}$  in a pH 6 Britton-Robinson Buffer solution under Ar saturation conditions, glassy carbon working electrode, glassy carbon counter electrode, 3.0 M NaCl Ag/AgCl reference electrode; varied scan rate.

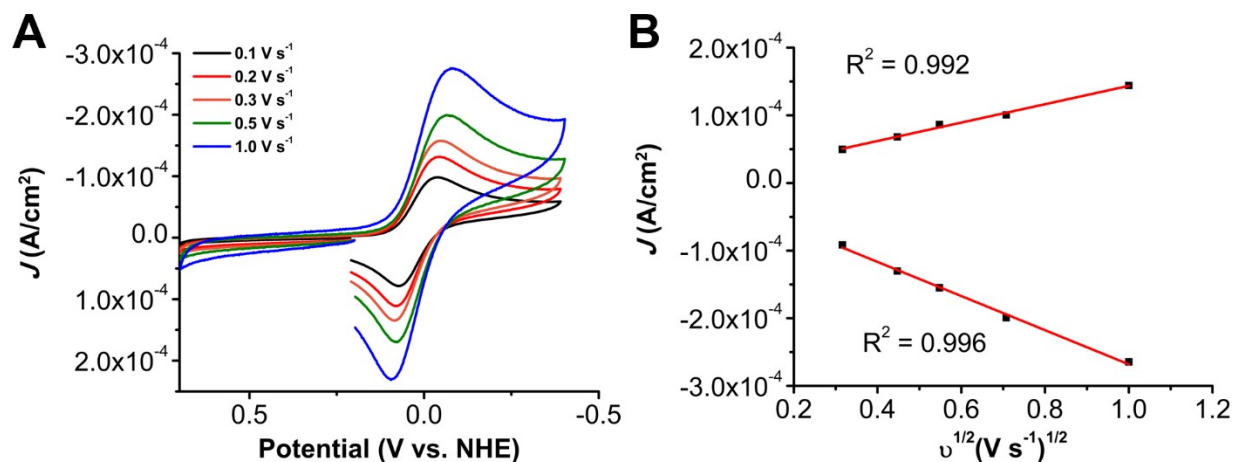

**Figure S6. (A)** Variable scan rate CVs **(B)** Linear fit demonstrating a homogenous response of  $[\text{Mn}(\text{TMPyP})\text{Cl}]^{+}$ . Conditions: 1 mM  $[\text{Mn}(\text{TMPyP})\text{Cl}]^{4+}$  in a pH 7 Britton-Robinson Buffer solution under Ar saturation conditions, glassy carbon working electrode, glassy carbon counter electrode, 3.0 M NaCl Ag/AgCl reference electrode; varied scan rate.

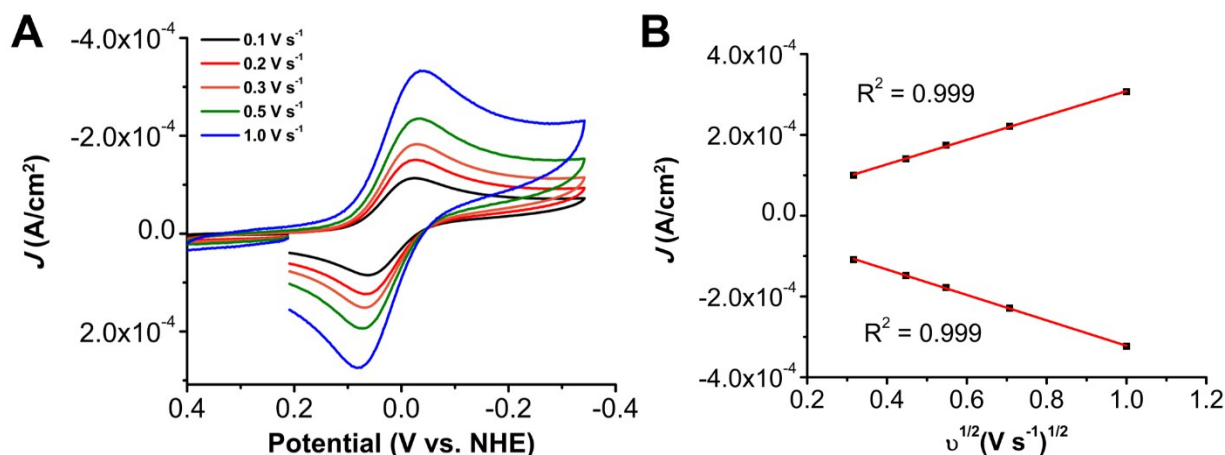

**Figure S7. (A)** Variable scan rate CVs **(B)** Linear fit demonstrating a homogenous response of  $[\text{Mn}(\text{TMPyP})\text{Cl}]^{4+}$ . Conditions: 1 mM  $[\text{Mn}(\text{TMPyP})\text{Cl}]^{4+}$  in a pH 8 Britton-Robinson Buffer solution under Ar saturation conditions, glassy carbon working electrode, glassy carbon counter electrode, 3.0 M NaCl Ag/AgCl reference electrode; varied scan rate.

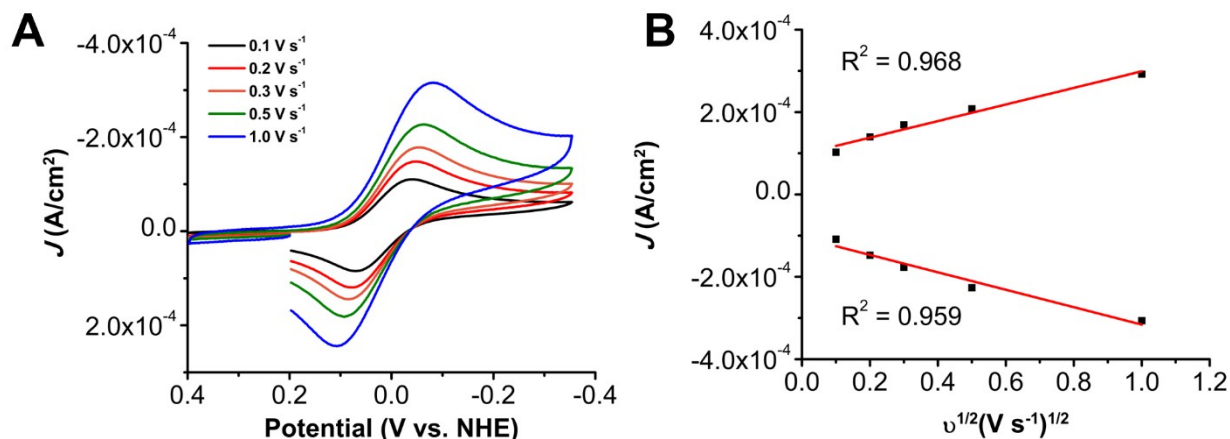

**Figure S8. (A)** Variable scan rate CVs **(B)** Linear fit demonstrating a homogenous response of  $[\text{Mn}(\text{TMPyP})\text{Cl}]^{4+}$ . Conditions: 1 mM  $[\text{Mn}(\text{TMPyP})\text{Cl}]^{4+}$  in a pH 9 Britton-Robinson Buffer solution under Ar saturation conditions, glassy carbon working electrode, glassy carbon counter electrode, 3.0 M NaCl Ag/AgCl reference electrode; varied scan rate.

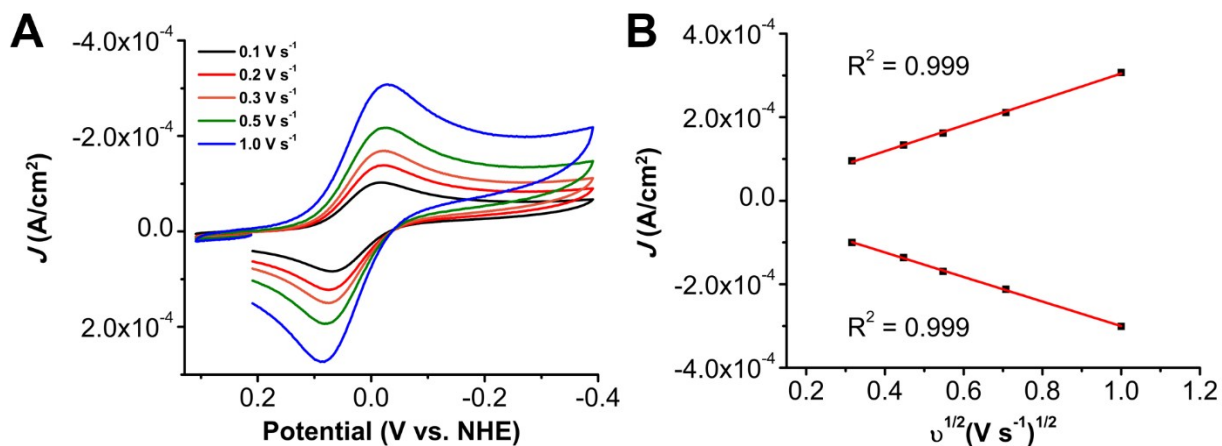

**Figure S9. (A)** Variable scan rate CVs **(B)** Linear fit demonstrating a homogenous response of [Mn(TMPyP)Cl]<sup>4+</sup>. Conditions: 1 mM [Mn(TMPyP)Cl]<sup>4+</sup> in a pH 10 Britton-Robinson Buffer solution under Ar saturation conditions, glassy carbon working electrode, glassy carbon counter electrode, 3.0 M NaCl Ag/AgCl reference electrode; varied scan rate.

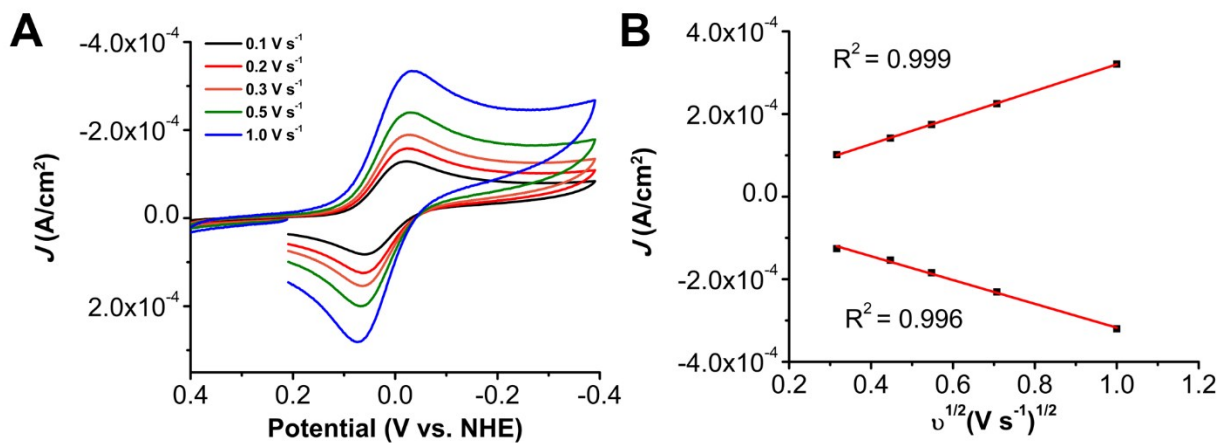

**Figure S10. (A)** Variable scan rate CVs **(B)** Linear fit demonstrating a homogenous response of [Mn(TMPyP)Cl]<sup>4+</sup>. Conditions: 1 mM [Mn(TMPyP)Cl]<sup>4+</sup> in a pH 11 Britton-Robinson Buffer solution under Ar saturation conditions, glassy carbon working electrode, glassy carbon counter electrode, 3.0 M NaCl Ag/AgCl reference electrode; varied scan rate.

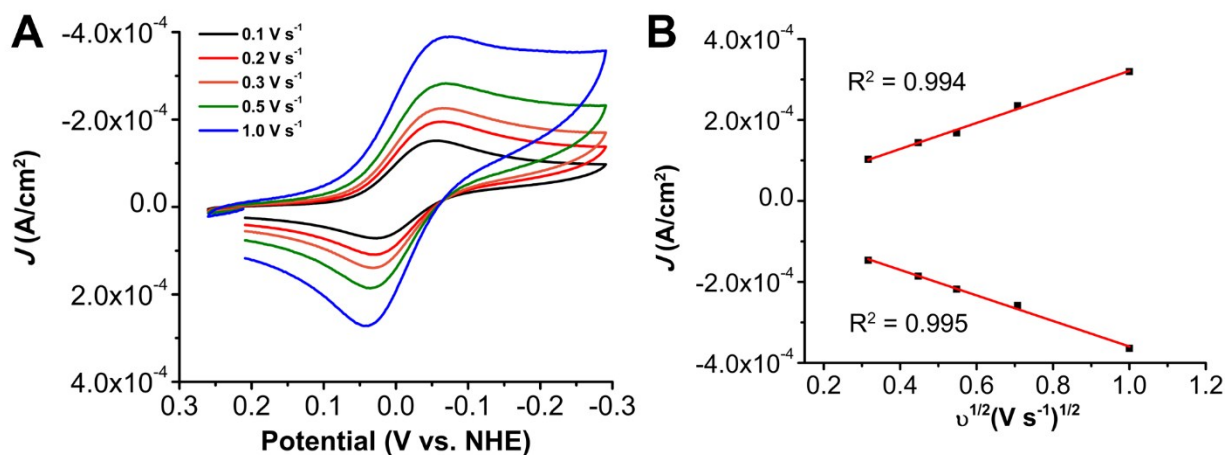

**Figure S11.** (A) Variable scan rate CVs (B) Linear fit demonstrating a homogenous response of  $[\text{Mn}(\text{TMPyP})\text{Cl}]^{4+}$ . Conditions: 1 mM  $[\text{Mn}(\text{TMPyP})\text{Cl}]^{4+}$  in a pH 12 Britton-Robinson Buffer solution under Ar saturation conditions, glassy carbon working electrode, glassy carbon counter electrode, 3.0 M NaCl Ag/AgCl reference electrode; varied scan rate.

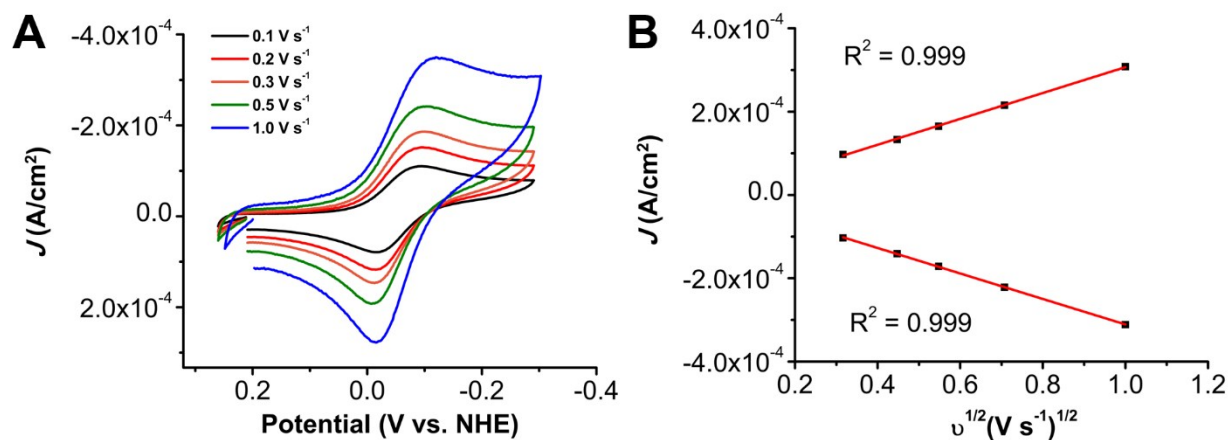

**Figure S12.** (A) Variable scan rate CVs (B) Linear fit demonstrating a homogenous response of  $[\text{Mn}(\text{TMPyP})\text{Cl}]^{4+}$ . Conditions: 1 mM  $[\text{Mn}(\text{TMPyP})\text{Cl}]^{4+}$  in a pH 13 Britton-Robinson Buffer solution under Ar saturation conditions, glassy carbon working electrode, glassy carbon counter electrode, 3.0 M NaCl Ag/AgCl reference electrode; varied scan rate.



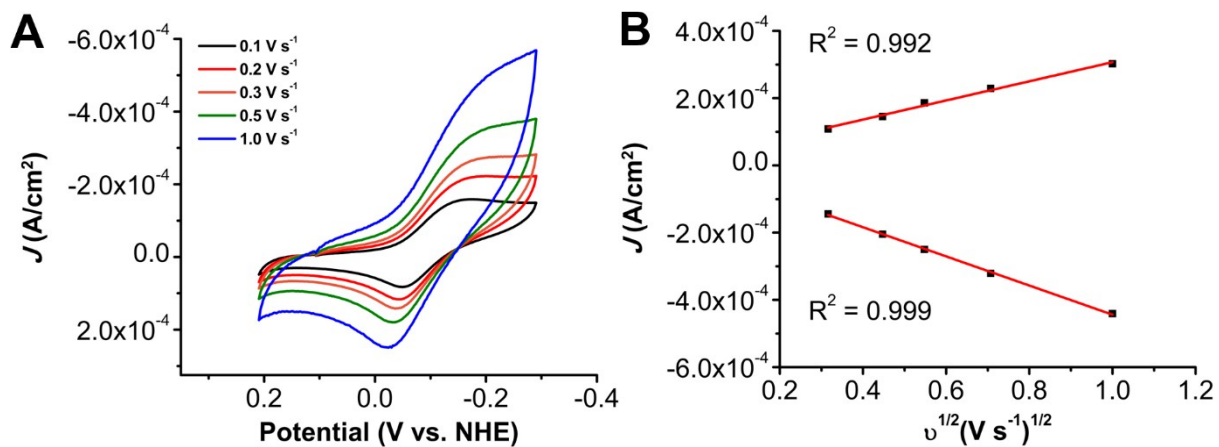

**Figure S13.** (A) Variable scan rate CVs (B) Linear fit demonstrating a homogenous response of  $[\text{Mn}(\text{TMPyP})\text{Cl}]^{4+}$ . Conditions: 1 mM  $[\text{Mn}(\text{TMPyP})\text{Cl}]^{4+}$  in a pH 14 Britton-Robinson Buffer solution under Ar saturation conditions, glassy carbon working electrode, glassy carbon counter electrode, 3.0 M NaCl Ag/AgCl reference electrode; varied scan rate.

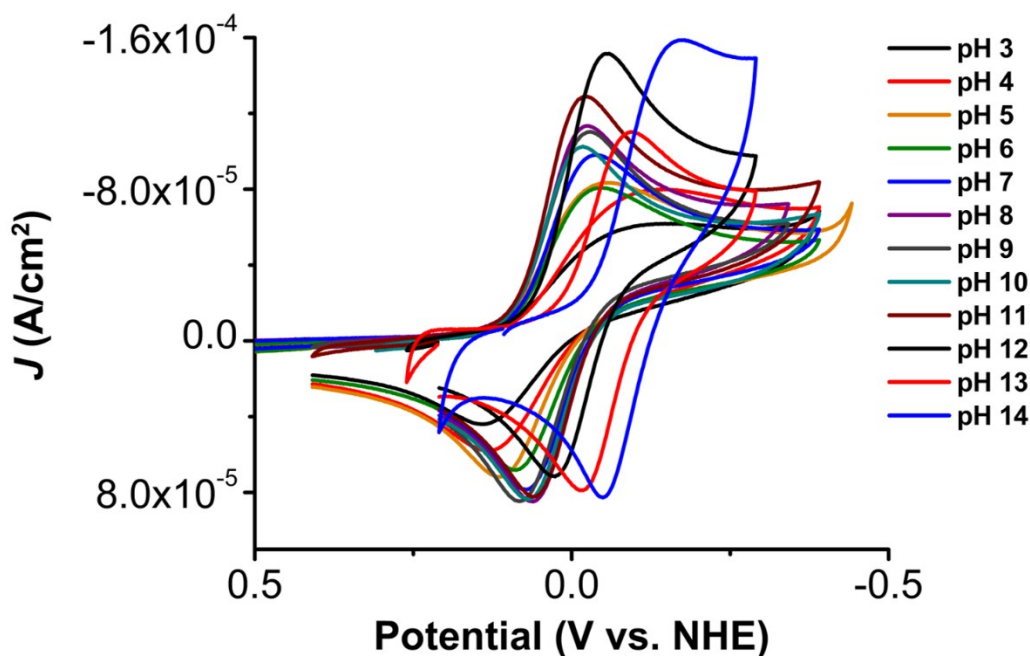

**Figure S14.** CVs of 1 mM  $[\text{Mn}(\text{TMPyP})\text{Cl}]^{4+}$  demonstrating the shift in  $E_{1/2}$  throughout the entire pH domain studied. Ar saturation conditions, glassy carbon working electrode, glassy carbon counter electrode, 3.0 M NaCl Ag/AgCl reference electrode; scan rate 100 mV/s.

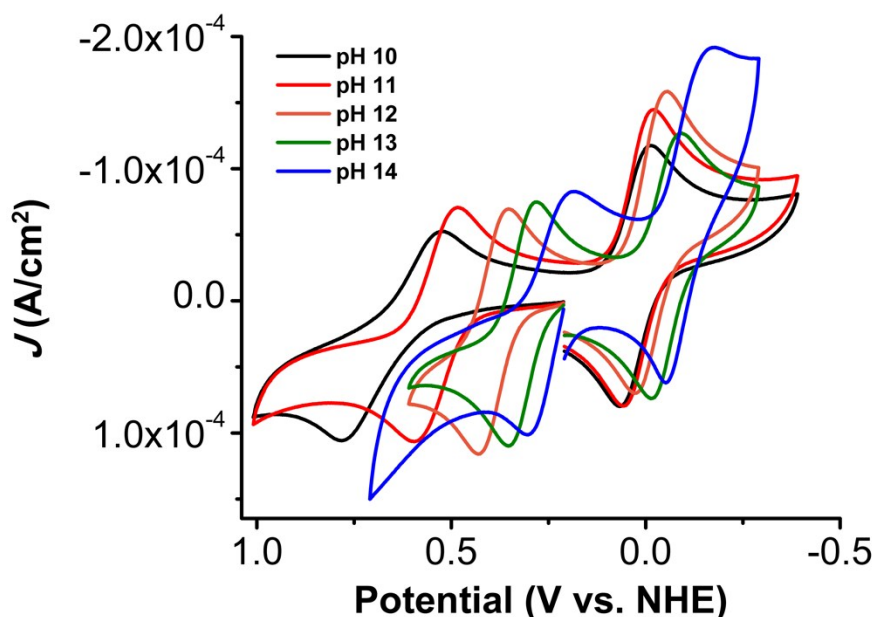

**Figure S15.** CVs of  $[\text{Mn}(\text{TMPyP})\text{Cl}]^{4+}$  establishing the appearance of a second feature and the pH dependence of the  $E_{1/2}$  under basic conditions in a Britton-Robinson buffer. Conditions: 1 mM  $[\text{Mn}(\text{TMPyP})\text{Cl}]^{4+}$  in Britton-Robinson Buffer solution at indicated pH under Ar saturation conditions, glassy carbon working electrode, glassy carbon counter electrode, 3.0 M NaCl Ag/AgCl reference electrode; scan rate 100 mV/s.

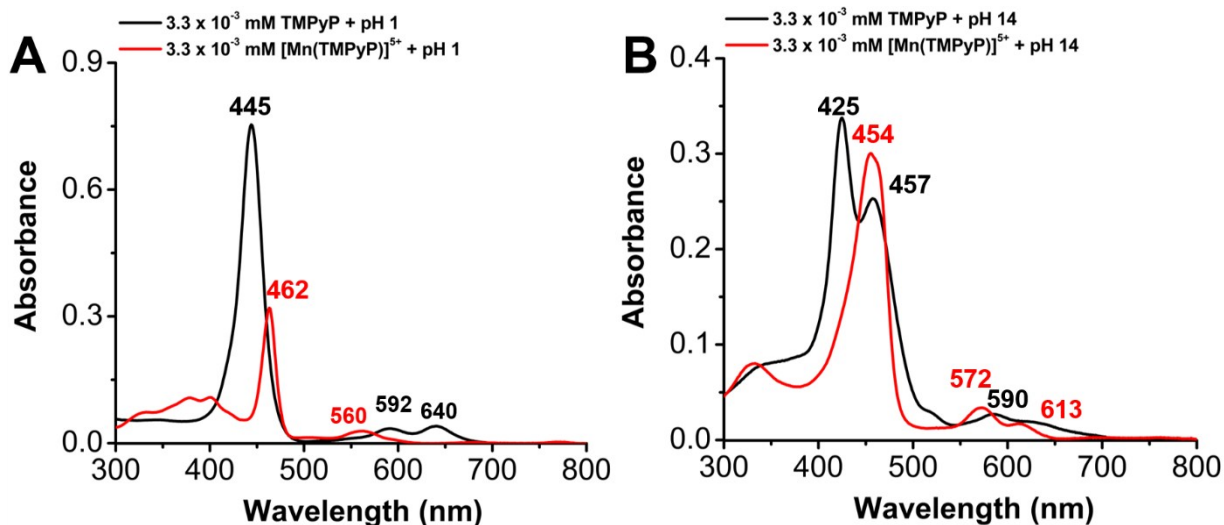

**Figure S16.** (A) UV-Vis spectrum of  $[\text{Mn}(\text{TMPyP})\text{Cl}]^{4+}$  and free base TMPyP showing that de-metalation does not occur in solution by monitoring the Soret band (B) and Q band shifts under pH 1 or 14 conditions.

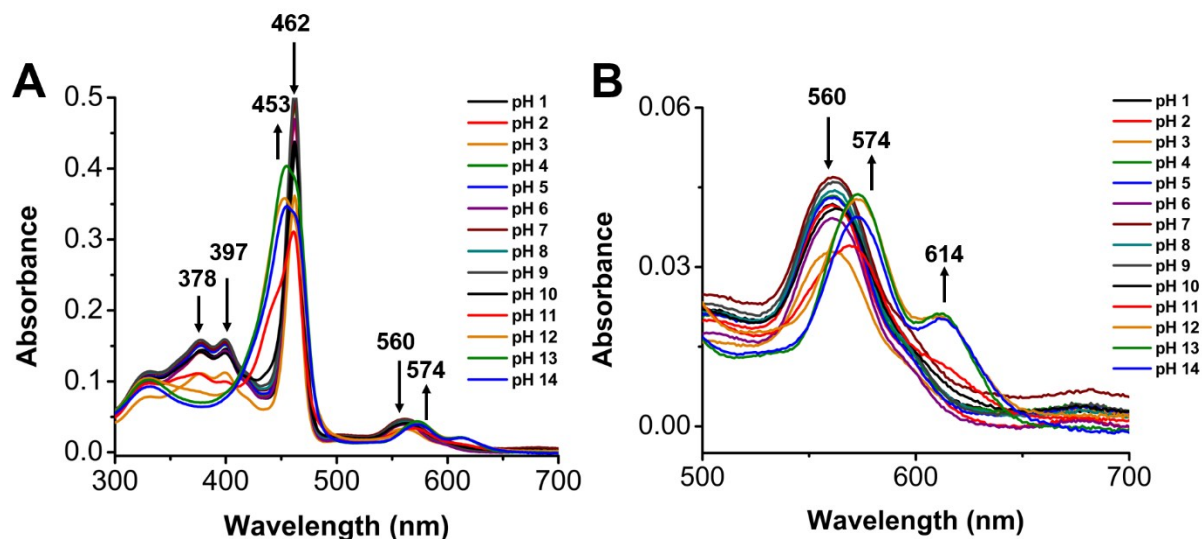

**Figure S17.** (A) UV-Vis spectrum of  $3.33 \times 10^{-6}$  M  $[\text{Mn}(\text{TMPyP})\text{Cl}]^{4+}$  throughout the pH domain with a decrease in absorbance at the characteristic Soret band occurring at 462 nm and the growth of a new band at 453 nm at higher pH (B) The characteristic Q band shifting from 560 to 572 towards high pH.

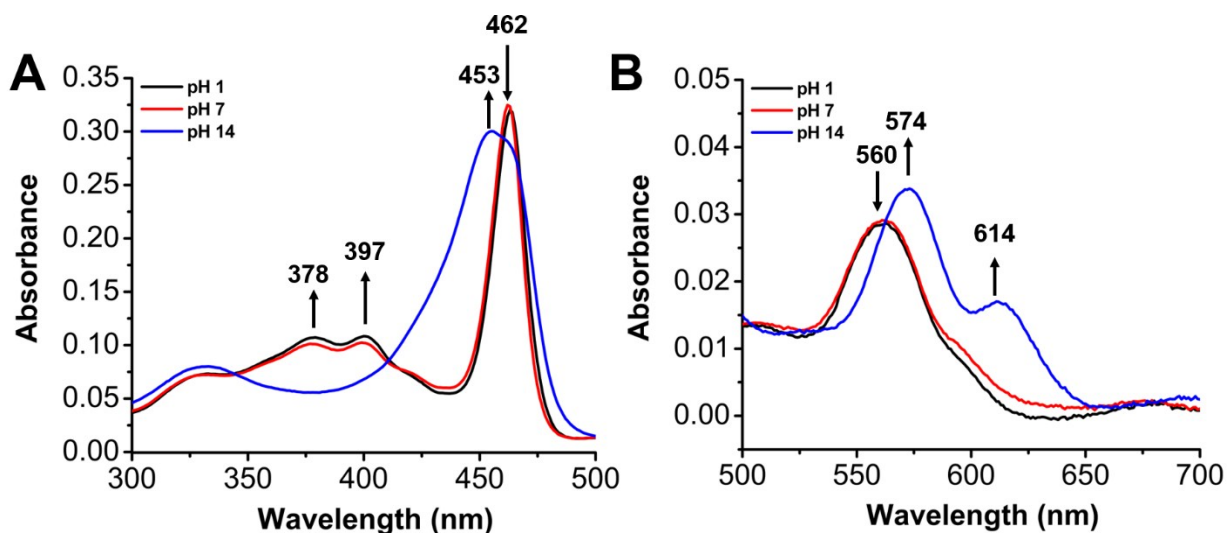

**Figure S18.** UV-Vis spectrum of  $3.33 \times 10^{-6}$  M  $[\text{Mn}(\text{TMPyP})\text{Cl}]^{4+}$  (A) Moving to higher pH demonstrates a decrease in absorbance at the Soret band (462 nm) with the appearance of a new band at 453 nm (B) While the Q band shifts from 560 to 572 nm.

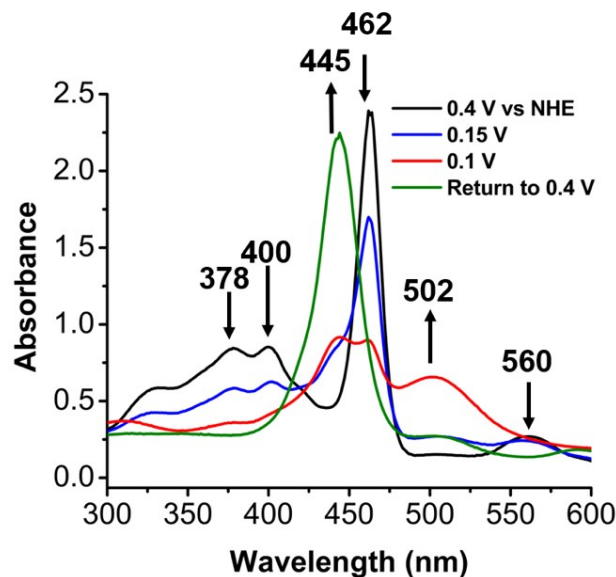

**Figure S19.** UV-Vis SEC spectrum of 0.1 mM  $[\text{Mn}(\text{TMPyP})\text{Cl}]^{4+}$  at pH 1 showing a decrease in the Soret band at 462 nm with the appearance of a new band at 440 nm as the potential is decreased from +0.40 V to +0.10 V vs NHE. The Q band is blue shifted from 560 to 502 nm upon reduction. Conditions: Honeycomb platinum electrode and Ag/AgCl sat'd KCl aqueous reference electrode.

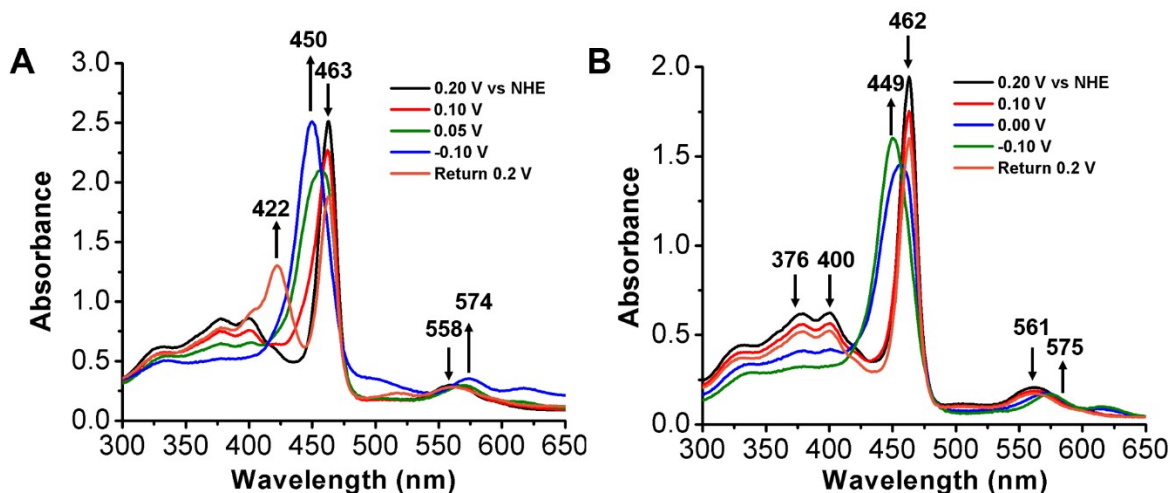

**Figure S20.** UV-Vis SEC spectra of 0.1 mM  $[\text{Mn}(\text{TMPyP})\text{Cl}]^{4+}$  in (A) pH 3 Britton-Robinson buffer solution showing a decrease in the Soret band at 463 nm with the appearance of a new band at 450 nm as the potential is decreased from +0.20 V to -0.10 V vs NHE. The Q band is red shifted from 558 to 574 nm upon reduction. (B) pH 7 Britton-Robinson buffer solution showing a decrease in the Soret band at 462 nm with the appearance of a new band at 449 nm as the potential is decreased from +0.20 V to -0.10 V vs NHE. The Q band is red shifted from 561 to 575 nm upon reduction. Conditions: Honeycomb platinum electrode and Ag/AgCl sat'd KCl aqueous reference electrode.

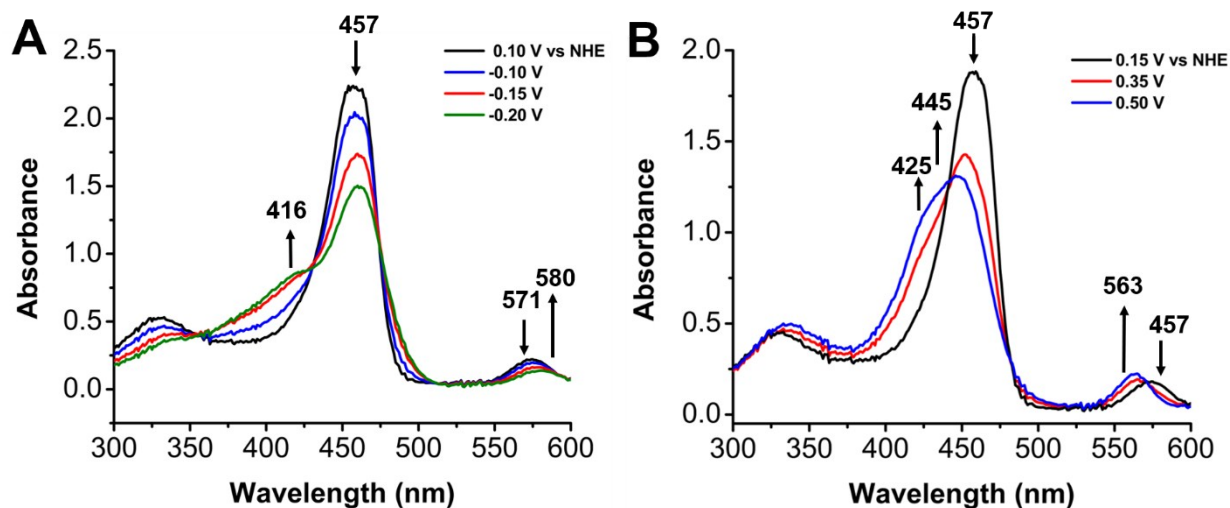

**Figure S21.** UV-Vis SEC spectrum of 0.1 mM  $[\text{Mn}(\text{TMPyP})\text{Cl}]^{4+}$  in pH 14 Britton-Robinson buffer (A) as the potential is decreased from +0.10 V to -0.20 V vs NHE a decrease in the Soret band at 457 nm occurs with the appearance of a new band at 416 nm (B) as the potential is increased from +0.15 to +0.50 V vs. NHE the formation of  $[\text{Mn}(\text{IV})(\text{O})(\text{TMPyP})(\text{OH})]^{3+}$  occurs as apparent from the new band at 425 nm with the loss of the Soret band observed. Conditions: Honeycomb platinum electrode and Ag/AgCl sat'd KCl aqueous reference electrode.

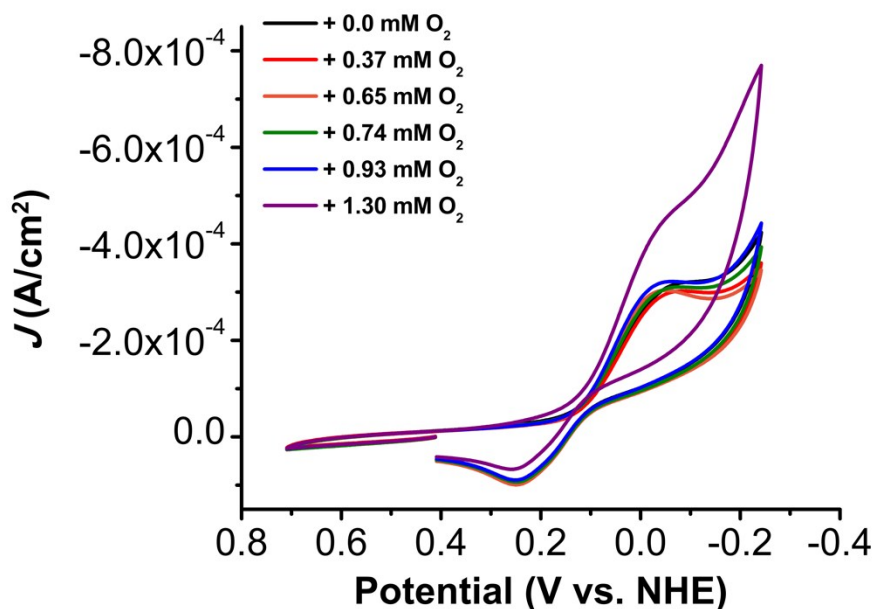

**Figure S22.** CV of 1 mM  $[\text{Mn}(\text{TMPyP})\text{Cl}]^{4+}$  with  $\text{O}_2$  titration showing low activity at pH 1. Conditions: 1 mM  $[\text{Mn}(\text{TMPyP})\text{Cl}]^{4+}$  in a pH 1 (1 M HCl / 0.1 M NaCl) solution; glassy carbon working electrode, glassy carbon counter electrode, 3.0 M NaCl Ag/AgCl; scan rate 100 mV/s.



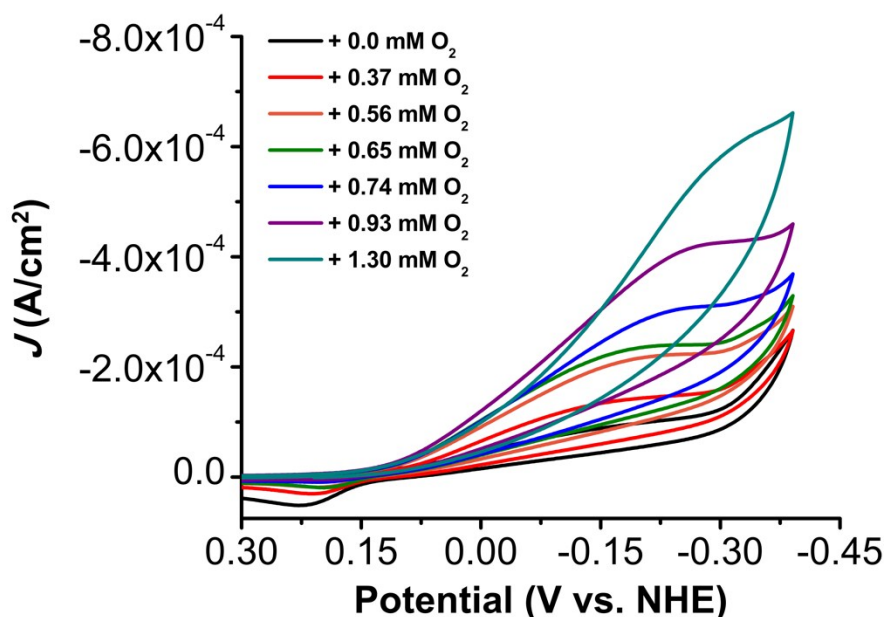

**Figure S23.** CVs under variable  $[O_2]$  showing an irreversible feature under pH 2 Britton-Robinson buffer solution. Conditions: 1 mM  $[Mn(TMPyP)Cl]^{4+}$  in a pH 2 Britton-Robinson buffer solution under Ar saturation conditions, glassy carbon working electrode, glassy carbon counter electrode, 3.0 M NaCl Ag/AgCl reference electrode; scan rate 100 mV/s.

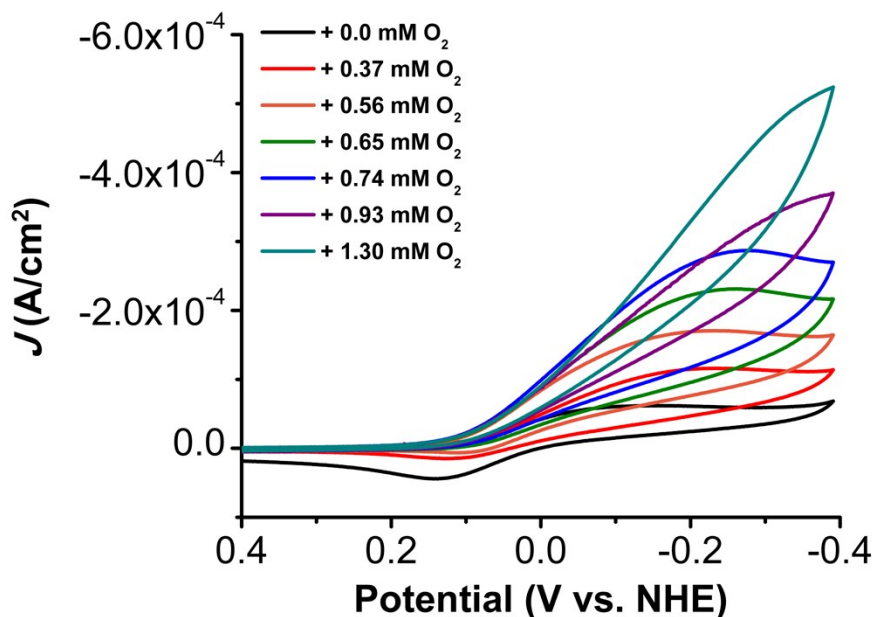

**Figure S24.** CVs of 1 mM  $[Mn(TMPyP)Cl]^{4+}$  with  $O_2$  titration demonstrating catalytic activity. Conditions: 1 mM  $[Mn(TMPyP)Cl]^{4+}$  in a pH 3 Britton-Robinson Buffer solution; glassy carbon working electrode, glassy carbon counter electrode, 3.0 M NaCl Ag/AgCl reference electrode; scan rate 100 mV/s.

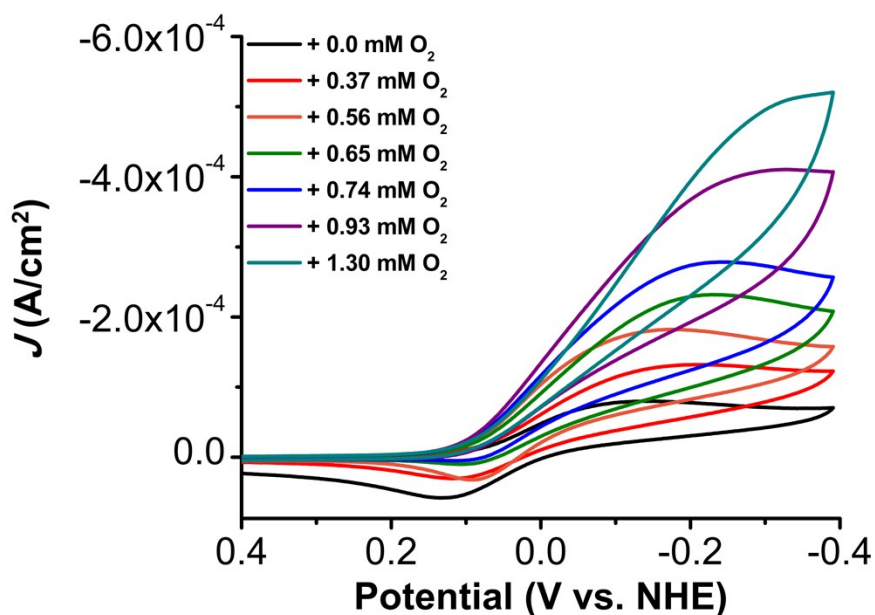

**Figure S25.** CVs of 1 mM  $[\text{Mn}(\text{TMPyP})\text{Cl}]^{4+}$  with  $\text{O}_2$  titration demonstrating catalytic activity. Conditions: 1 mM  $[\text{Mn}(\text{TMPyP})\text{Cl}]^{4+}$  in a pH 4 Britton-Robinson Buffer solution; glassy carbon working electrode, glassy carbon counter electrode, 3.0 M NaCl Ag/AgCl reference; scan rate 100 mV/s.

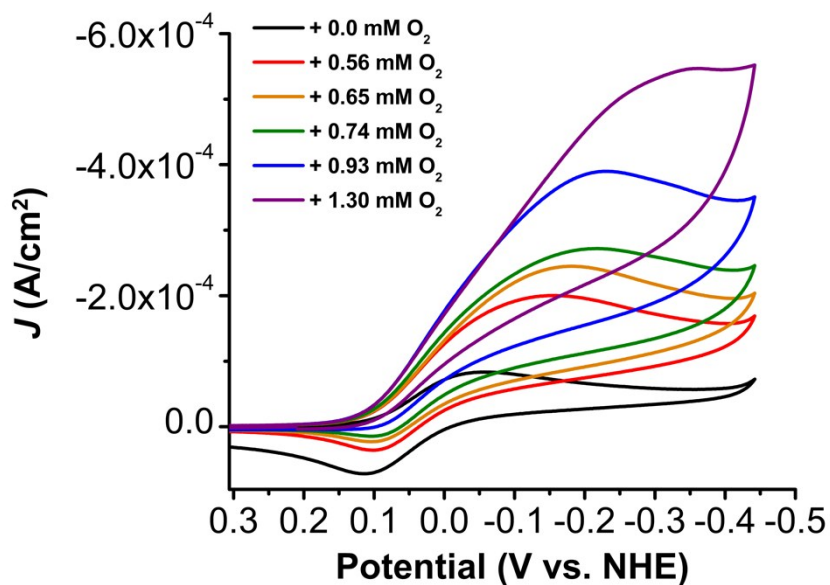

**Figure S26.** CVs of 1 mM  $[\text{Mn}(\text{TMPyP})\text{Cl}]^{4+}$  with  $\text{O}_2$  titration demonstrating catalytic activity. Conditions: 1 mM  $[\text{Mn}(\text{TMPyP})\text{Cl}]^{4+}$  in a pH 5 Britton-Robinson Buffer solution; glassy carbon working electrode, glassy carbon counter electrode, 3.0 M NaCl Ag/AgCl reference; scan rate 100 mV/s.

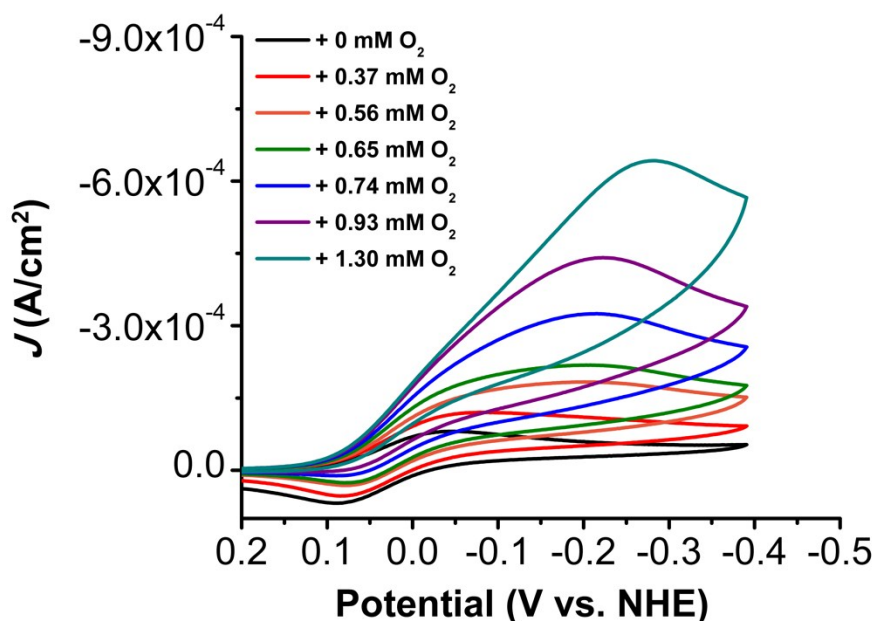

**Figure S27.** CVs of 1 mM  $[\text{Mn}(\text{TMPyP})\text{Cl}]^{4+}$  with  $\text{O}_2$  titration demonstrating catalytic activity. Conditions: 1 mM  $[\text{Mn}(\text{TMPyP})\text{Cl}]^{4+}$  in a pH 6 Britton-Robinson Buffer solution; glassy carbon working electrode, glassy carbon counter electrode, 3.0 M NaCl Ag/AgCl reference; scan rate 100 mV/s.

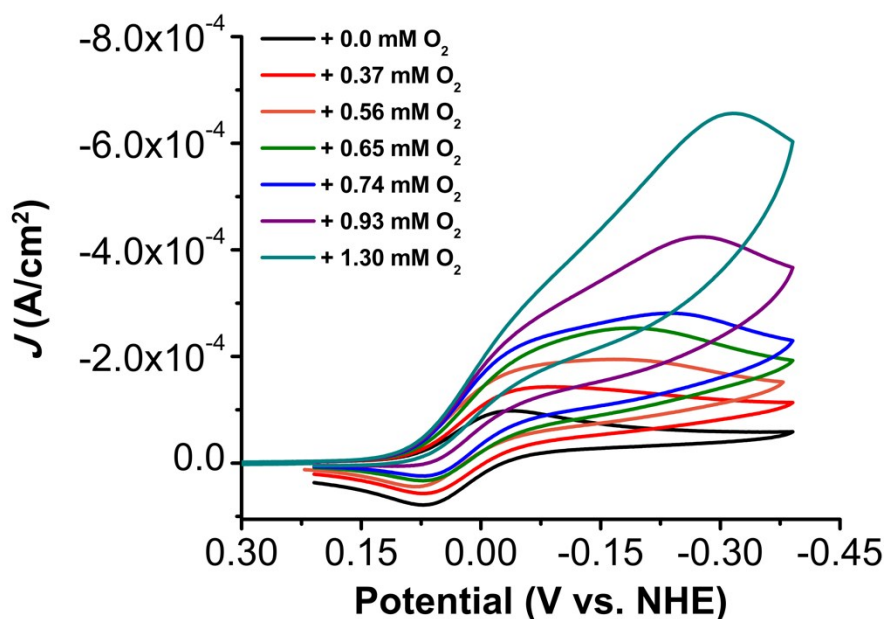

**Figure S28.** CVs of 1 mM  $[\text{Mn}(\text{TMPyP})\text{Cl}]^{4+}$  with  $\text{O}_2$  titration. Conditions: 1 mM  $[\text{Mn}(\text{TMPyP})\text{Cl}]^{4+}$  in a pH 7 Britton-Robinson Buffer solution; glassy carbon working electrode, glassy carbon counter electrode, 3.0 M NaCl Ag/AgCl reference; scan rate 100 mV/s.



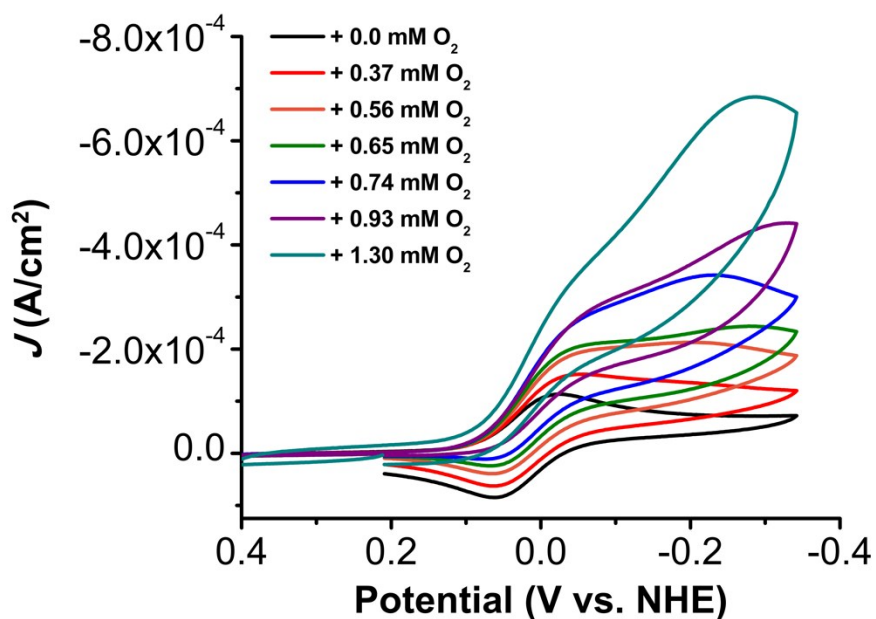

**Figure S29.** CVs of 1 mM  $[\text{Mn}(\text{TMPyP})\text{Cl}]^{4+}$  with  $\text{O}_2$  titration. Conditions: 1 mM  $[\text{Mn}(\text{TMPyP})\text{Cl}]^{4+}$  in a pH 8 Britton-Robinson Buffer solution; glassy carbon working electrode, glassy carbon counter electrode, 3.0 M NaCl Ag/AgCl; scan rate 100 mV/s.

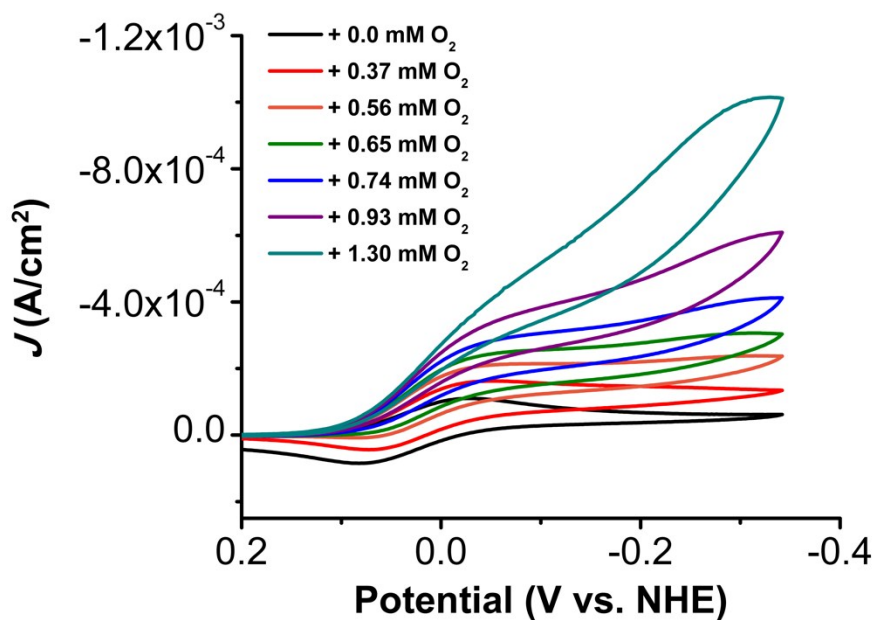

**Figure S30.** CVs of 1 mM  $[\text{Mn}(\text{TMPyP})\text{Cl}]^{4+}$  with  $\text{O}_2$  titration. Conditions: 1 mM  $[\text{Mn}(\text{TMPyP})\text{Cl}]^{4+}$  in a pH 9 Britton-Robinson Buffer solution; glassy carbon working electrode, glassy carbon counter electrode, 3.0 M NaCl Ag/AgCl reference; scan rate 100 mV/s.

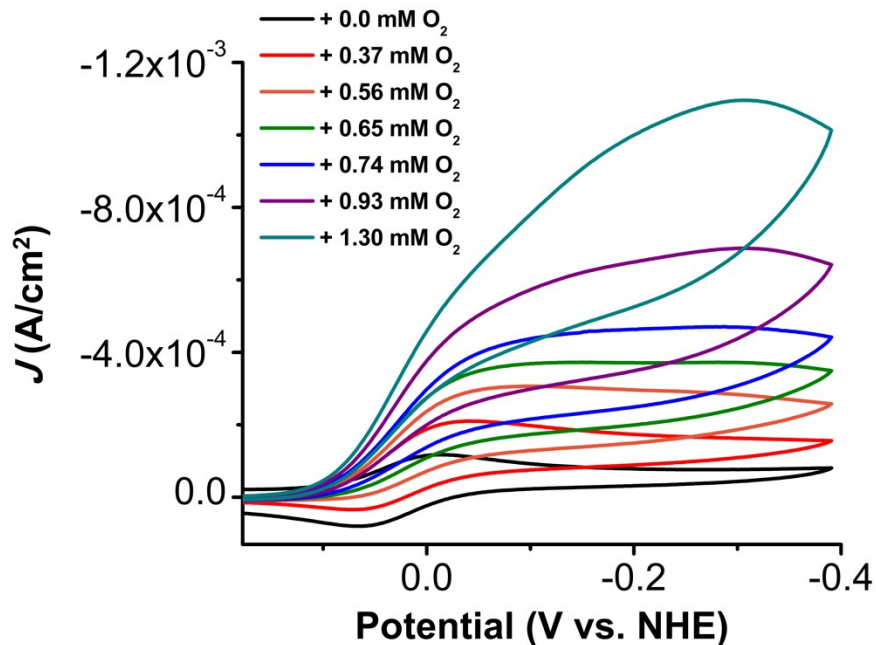

**Figure S31.** CVs of 1 mM  $[\text{Mn}(\text{TMPyP})\text{Cl}]^{4+}$  with  $\text{O}_2$  titration. Conditions: 1 mM  $[\text{Mn}(\text{TMPyP})\text{Cl}]^{4+}$  in a pH 10 Britton-Robinson Buffer solution; glassy carbon working electrode, glassy carbon counter electrode, 3.0 M NaCl Ag/AgCl reference; scan rate 100 mV/s.

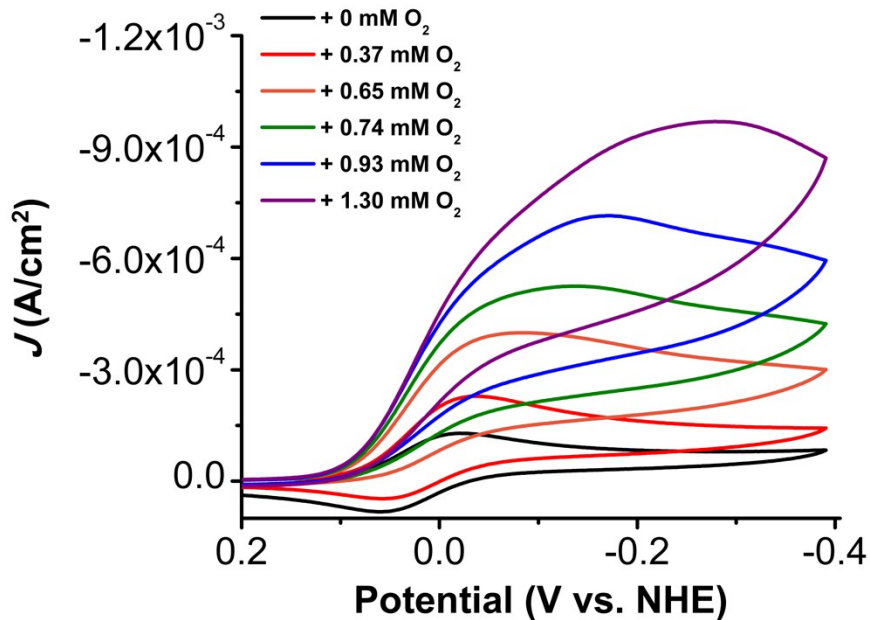

**Figure S32.** CVs of 1 mM  $[\text{Mn}(\text{TMPyP})\text{Cl}]^{4+}$  with  $\text{O}_2$  titration. Conditions: 1 mM  $[\text{Mn}(\text{TMPyP})\text{Cl}]^{4+}$  in a pH 11 Britton-Robinson Buffer solution; glassy carbon working electrode, glassy carbon counter electrode, 3.0 M NaCl Ag/AgCl reference; scan rate 100 mV/s.

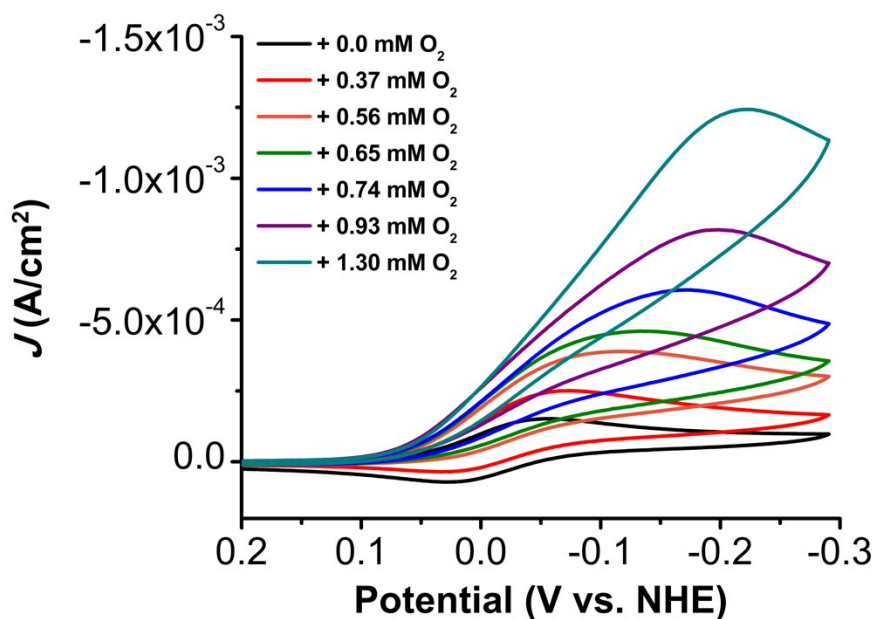

**Figure S33.** CVs of 1 mM  $[\text{Mn}(\text{TMPyP})\text{Cl}]^{4+}$  with  $\text{O}_2$  titration. Conditions: 1 mM  $[\text{Mn}(\text{TMPyP})\text{Cl}]^{4+}$  in a pH 12 Britton-Robinson Buffer solution; glassy carbon working electrode, glassy carbon counter electrode, 3.0 M NaCl Ag/AgCl reference; scan rate 100 mV/s.

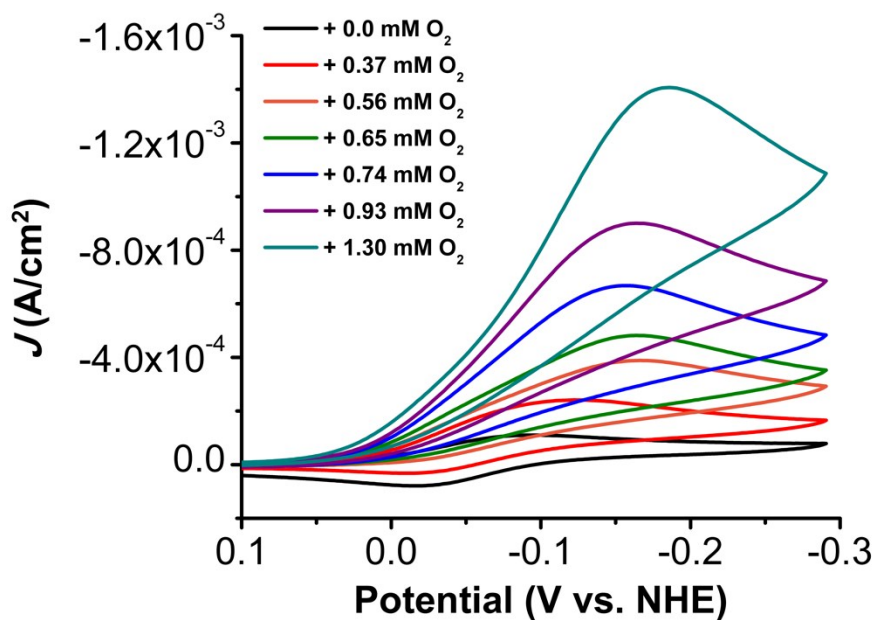

**Figure S34.** CVs of 1 mM  $[\text{Mn}(\text{TMPyP})\text{Cl}]^{4+}$  with  $\text{O}_2$  titration. Conditions: 1 mM  $[\text{Mn}(\text{TMPyP})\text{Cl}]^{4+}$  in a pH 13 Britton-Robinson Buffer solution; glassy carbon working electrode, glassy carbon counter electrode, 3.0 M NaCl Ag/AgCl reference; scan rate 100 mV/s.

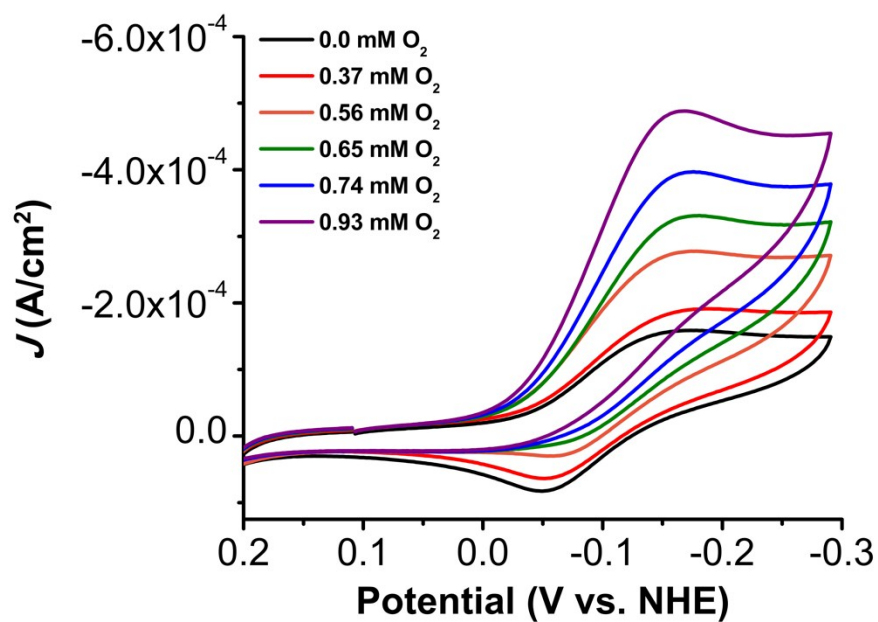

**Figure S35.** CVs of 1 mM  $[\text{Mn}(\text{TMPyP})\text{Cl}]^{4+}$  with  $\text{O}_2$  titration. Conditions: 1 mM  $[\text{Mn}(\text{TMPyP})\text{Cl}]^{4+}$  in a pH 14 Britton-Robinson Buffer solution; glassy carbon working electrode, glassy carbon counter electrode, 3.0 M NaCl Ag/AgCl reference; scan rate 100 mV/s.

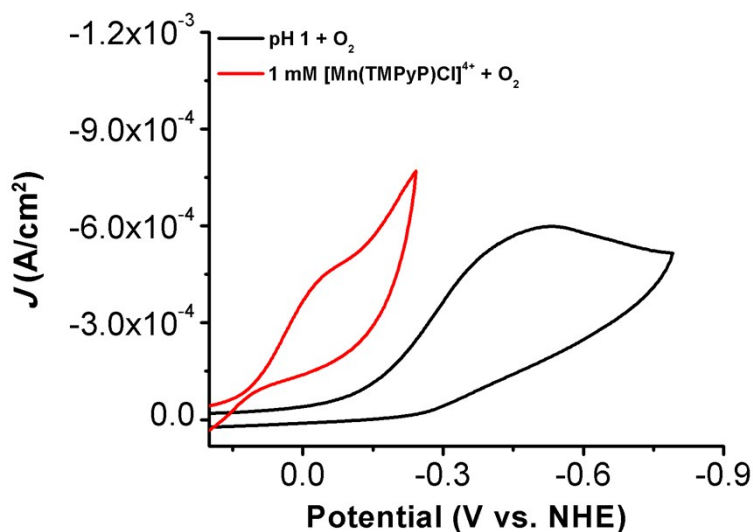

**Figure S36.** Control CV of a blank pH 1 (1 M HCl / 0.1 M NaCl) solution under O<sub>2</sub> saturation conditions in comparison to a 1 mM [Mn(TMPyP)Cl]<sup>4+</sup> solution under O<sub>2</sub> showing the molecular regime for the catalyst. Conditions: Glassy carbon working electrode, glassy carbon counter electrode, 3.0 M NaCl Ag/AgCl reference electrode; scan rate 100 mV/s.

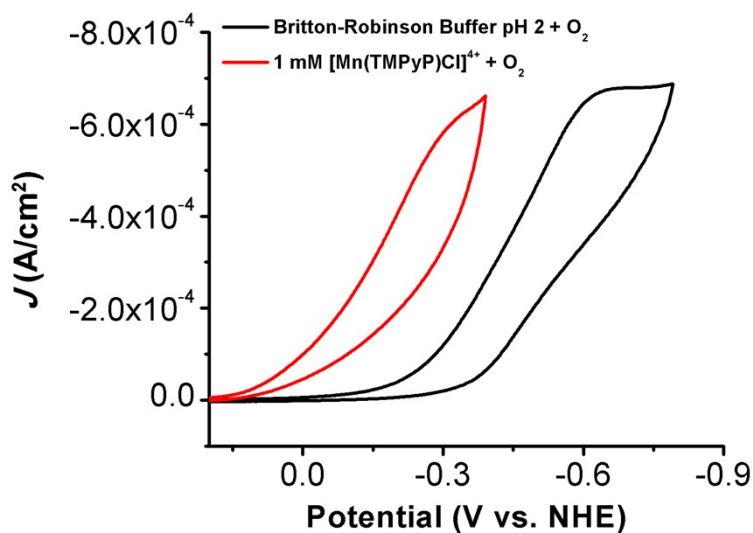

**Figure S37.** Control CV of a blank pH 2 Britton-Robinson Buffer solution under O<sub>2</sub> saturation conditions in comparison to a 1 mM [Mn(TMPyP)Cl]<sup>4+</sup> solution under O<sub>2</sub> showing the molecular regime for the catalyst. Conditions: Glassy carbon working electrode, glassy carbon counter electrode, 3.0 M NaCl Ag/AgCl reference electrode; scan rate 100 mV/s.

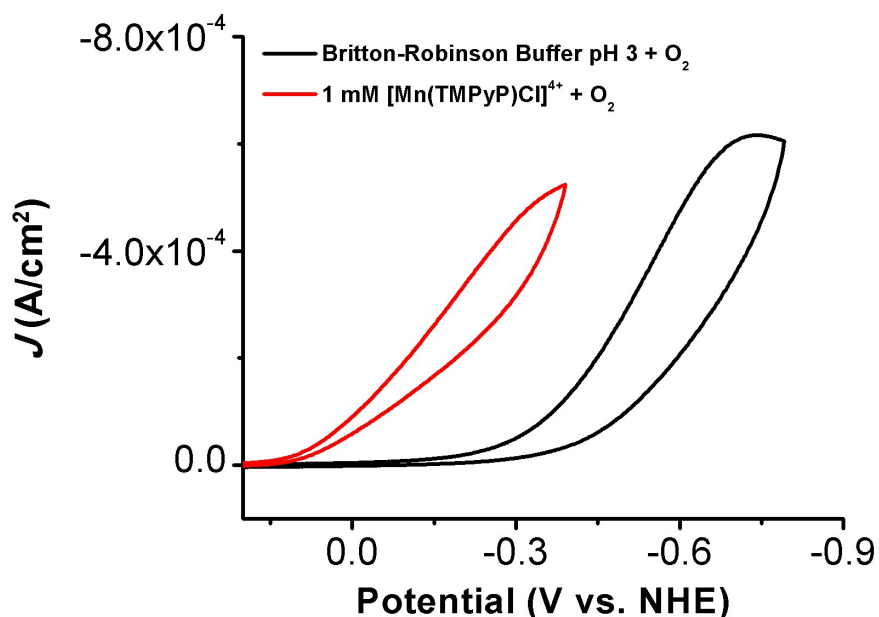

**Figure S38.** Control CV of a blank pH 3 Britton-Robinson Buffer solution under O<sub>2</sub> saturation conditions in comparison to a 1 mM [Mn(TMPyP)Cl]<sup>4+</sup> solution under O<sub>2</sub> showing the molecular regime for the catalyst. Conditions: Glassy carbon working electrode, glassy carbon counter electrode, 3.0 M NaCl Ag/AgCl reference electrode; scan rate 100 mV/s.

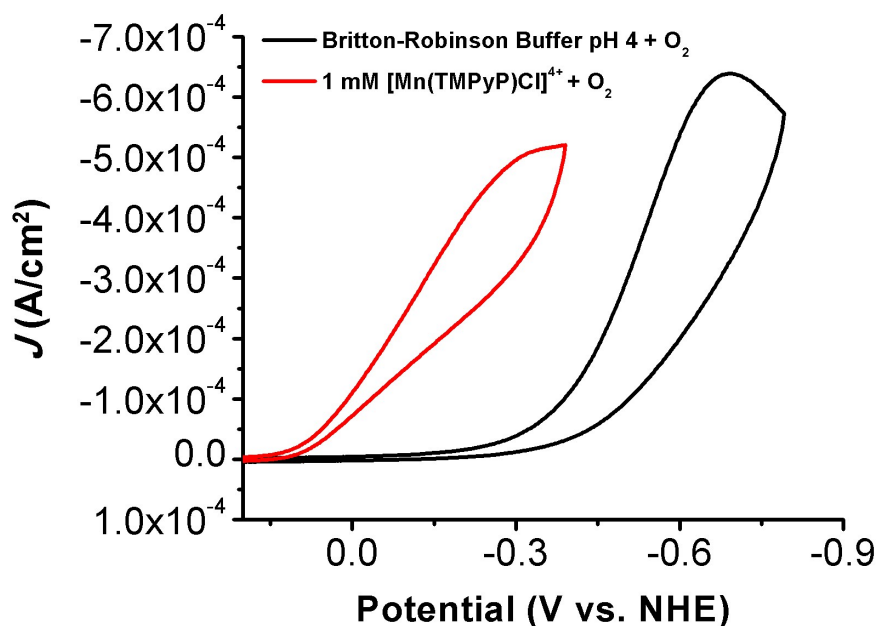

**Figure S39.** Control CV of a blank pH 4 Britton-Robinson Buffer solution under O<sub>2</sub> saturation conditions in comparison to a 1 mM [Mn(TMPyP)Cl]<sup>4+</sup> solution under O<sub>2</sub> showing the molecular regime for the catalyst. Conditions: Glassy carbon working electrode, glassy carbon counter electrode, 3.0 M NaCl Ag/AgCl reference electrode; scan rate 100 mV/s.

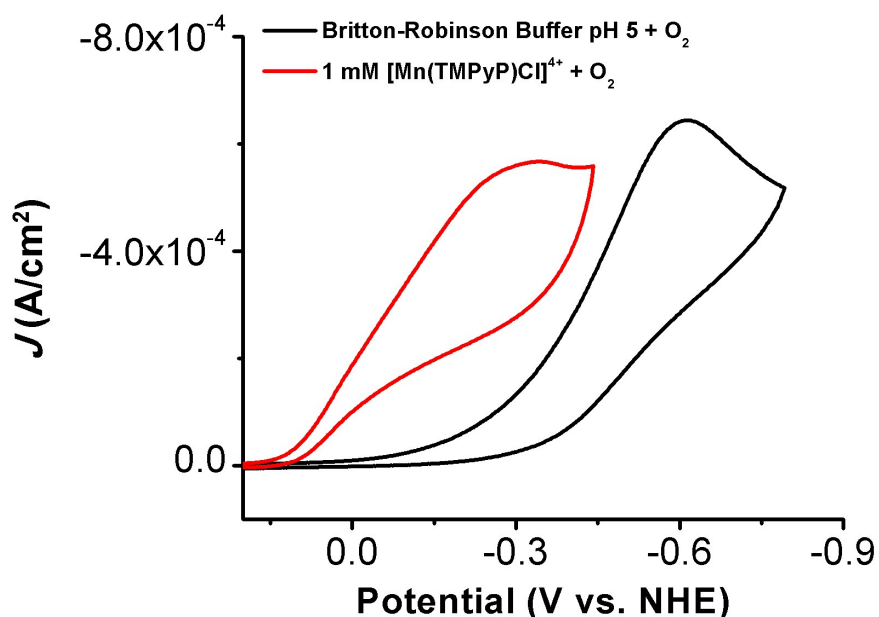

**Figure S40.** Control CV of a blank pH 5 Britton-Robinson Buffer solution under  $O_2$  saturation conditions in comparison to a 1 mM  $[Mn(TMPyP)Cl]^{4+}$  solution under  $O_2$  showing the molecular regime for the catalyst. Conditions: Glassy carbon working electrode, glassy carbon counter electrode, 3.0 M NaCl Ag/AgCl reference electrode; scan rate 100 mV/s.

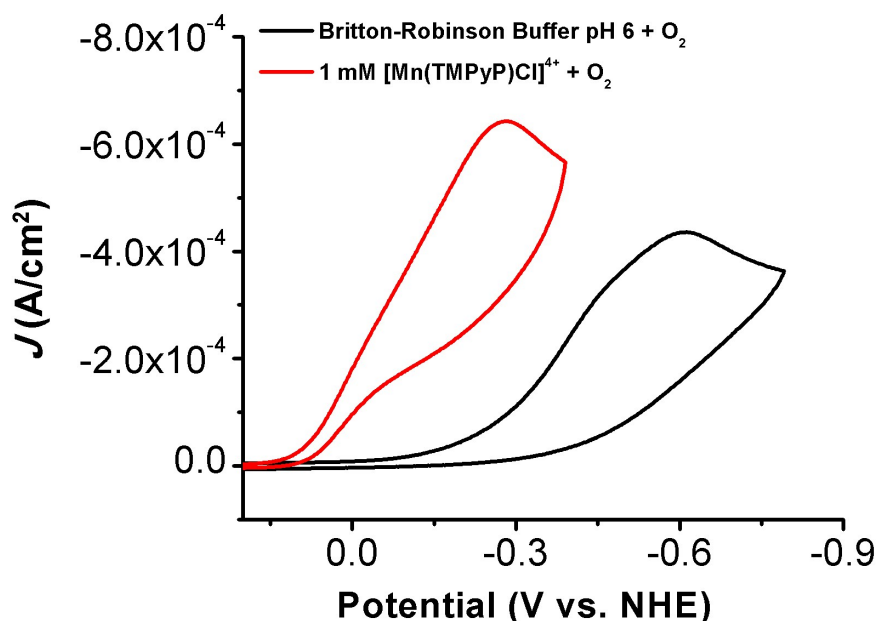

**Figure S41.** Control CV of a blank pH 6 Britton-Robinson Buffer solution under  $O_2$  saturation conditions in comparison to a 1 mM  $[Mn(TMPyP)Cl]^{4+}$  solution under  $O_2$  showing the molecular regime for the catalyst. Conditions: Glassy carbon working electrode, glassy carbon counter electrode, 3.0 M NaCl Ag/AgCl reference electrode; scan rate 100 mV/s.

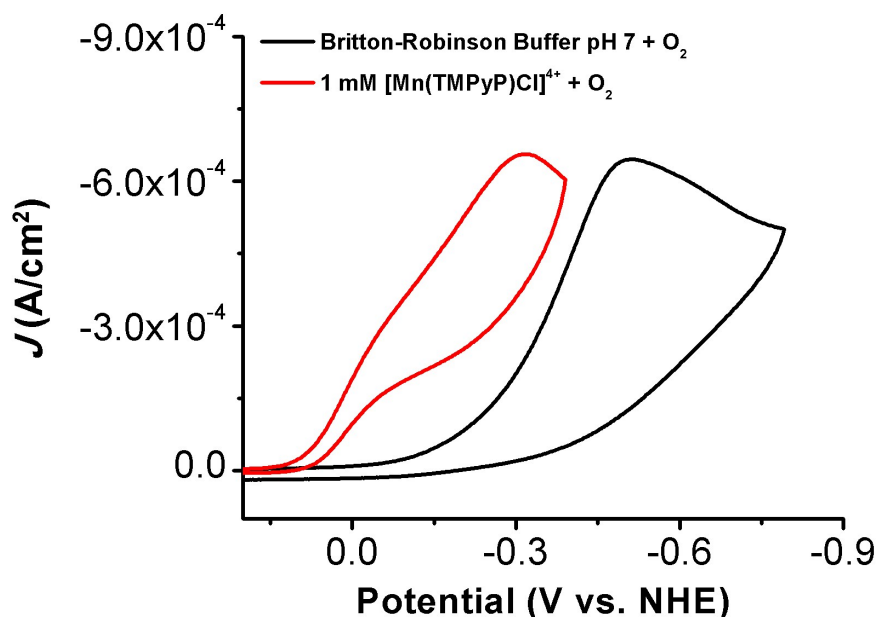

**Figure S42.** Control CV of a blank pH 7 Britton-Robinson Buffer solution under  $O_2$  saturation conditions in comparison to a 1 mM  $[Mn(TMPyP)Cl]^{4+}$  solution under  $O_2$  showing the molecular regime for the catalyst. Conditions: Glassy carbon working electrode, glassy carbon counter electrode, 3.0 M NaCl Ag/AgCl reference electrode; scan rate 100 mV/s.

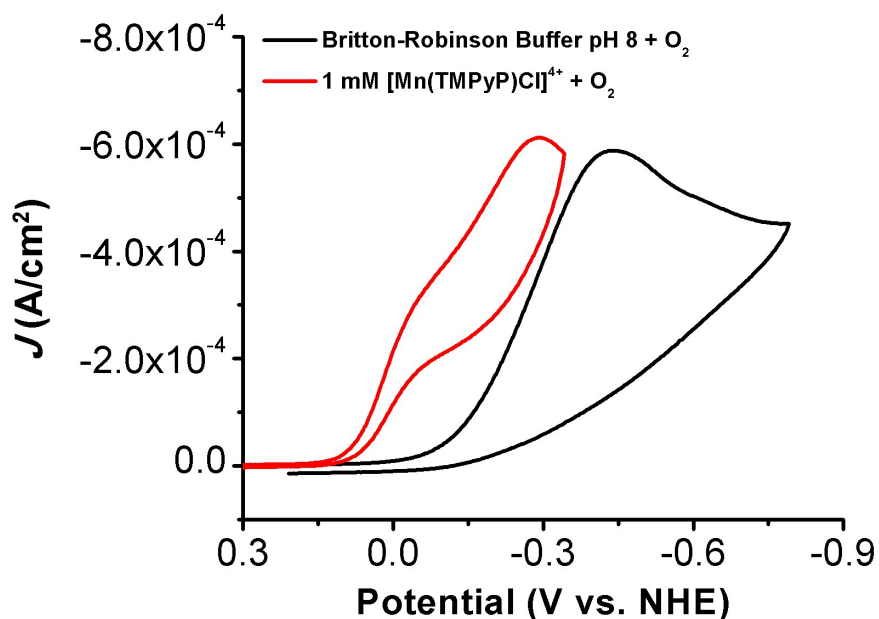

**Figure S43.** Control CV of a blank pH 8 Britton-Robinson Buffer solution under  $O_2$  saturation conditions in comparison to a 1 mM  $[Mn(TMPyP)Cl]^{4+}$  solution under  $O_2$  showing the molecular regime for the catalyst. Conditions: Glassy carbon working electrode, glassy carbon counter electrode, 3.0 M NaCl Ag/AgCl reference; scan rate 100 mV/s.



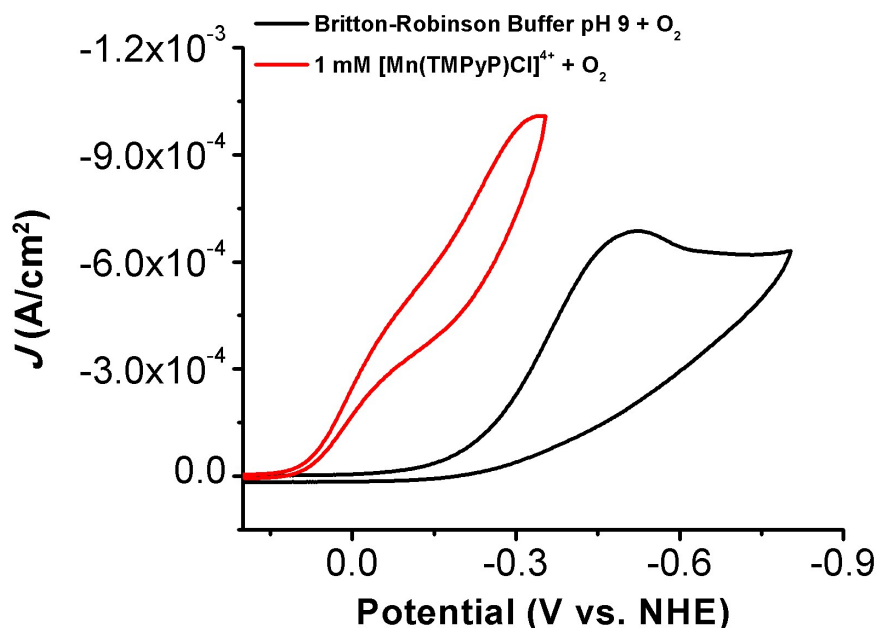

**Figure S44.** Control CV of a blank pH 9 Britton-Robinson Buffer solution under  $O_2$  saturation conditions in comparison to a 1 mM  $[Mn(TMPyP)Cl]^{4+}$  solution under  $O_2$  showing the molecular regime for the catalyst. Conditions: Glassy carbon working electrode, glassy carbon counter electrode, 3.0 M NaCl Ag/AgCl reference electrode; scan rate 100 mV/s.

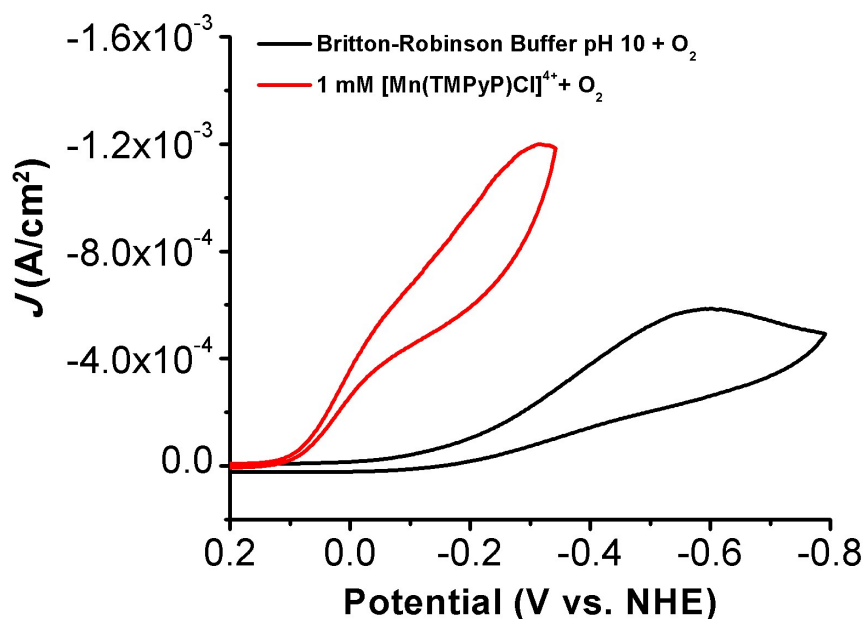

**Figure S45.** Control CV of a blank pH 10 Britton-Robinson Buffer solution under  $O_2$  saturation conditions in comparison to a 1 mM  $[Mn(TMPyP)Cl]^{4+}$  solution under  $O_2$  showing the molecular regime for the catalyst. Conditions: Glassy carbon working electrode, glassy carbon counter electrode, 3.0 M NaCl Ag/AgCl reference electrode; scan rate 100 mV/s.

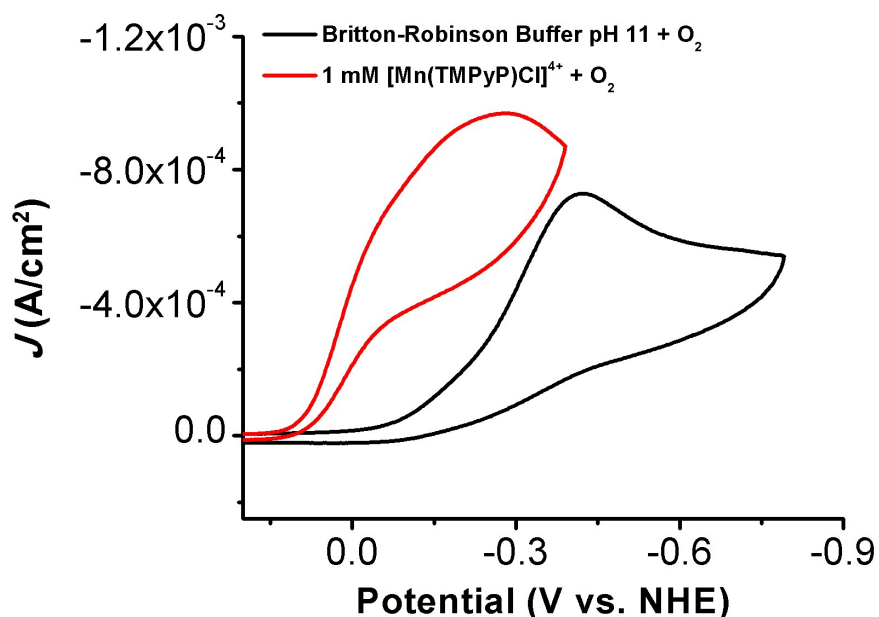

**Figure S46.** Control CV of a blank pH 11 Britton-Robinson Buffer solution under  $O_2$  saturation conditions in comparison to a 1 mM  $[Mn(TMPyP)Cl]^{4+}$  solution under  $O_2$  showing the molecular regime for the catalyst. Conditions: Glassy carbon working electrode, glassy carbon counter electrode, 3.0 M NaCl Ag/AgCl reference electrode; scan rate 100 mV/s.

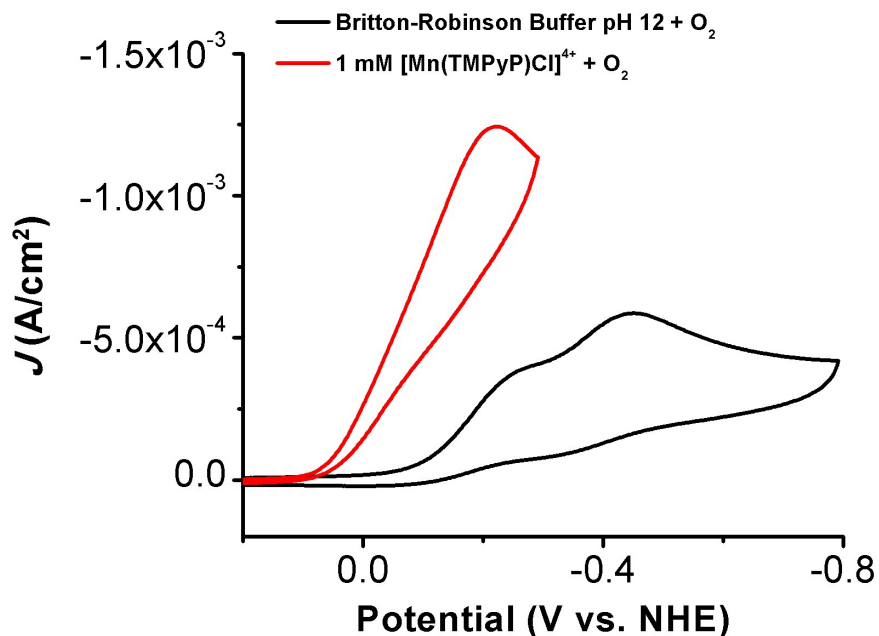

**Figure S47.** Control CV of a blank pH 12 Britton-Robinson Buffer solution under  $O_2$  saturation conditions in comparison to a 1 mM  $[Mn(TMPyP)Cl]^{4+}$  solution under  $O_2$  showing the molecular regime for the catalyst. Conditions: Glassy carbon working electrode, glassy carbon counter electrode, 3.0 M NaCl Ag/AgCl reference electrode; scan rate 100 mV/s.

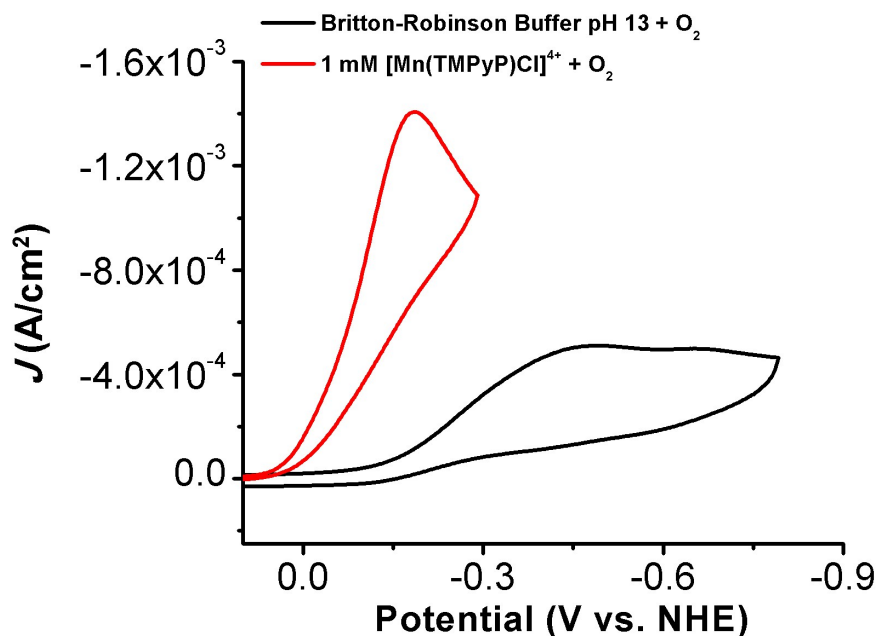

**Figure S48.** Control CV of a blank pH 13 Britton-Robinson Buffer solution under O<sub>2</sub> saturation conditions in comparison to a 1 mM [Mn(TMPyP)Cl]<sup>4+</sup> solution under O<sub>2</sub> showing the molecular regime for the catalyst. Conditions: Glassy carbon working electrode, glassy carbon counter electrode, 3.0 M NaCl Ag/AgCl reference electrode; scan rate 100 mV/s.

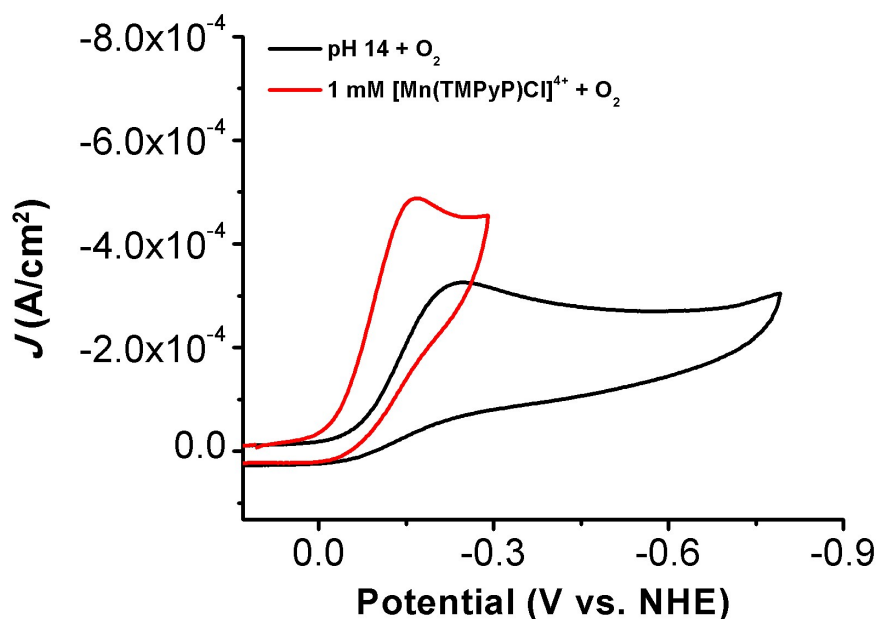

**Figure S49.** Control CV of a blank pH 14 (1 M KOH / 0.1 M NaCl) solution under O<sub>2</sub> saturation conditions in comparison to a 1 mM [Mn(TMPyP)Cl]<sup>4+</sup> solution under O<sub>2</sub> showing the molecular regime for the catalyst. Conditions: Glassy carbon working electrode, glassy carbon counter electrode, 3.0 M NaCl Ag/AgCl reference electrode; scan rate 100 mV/s.

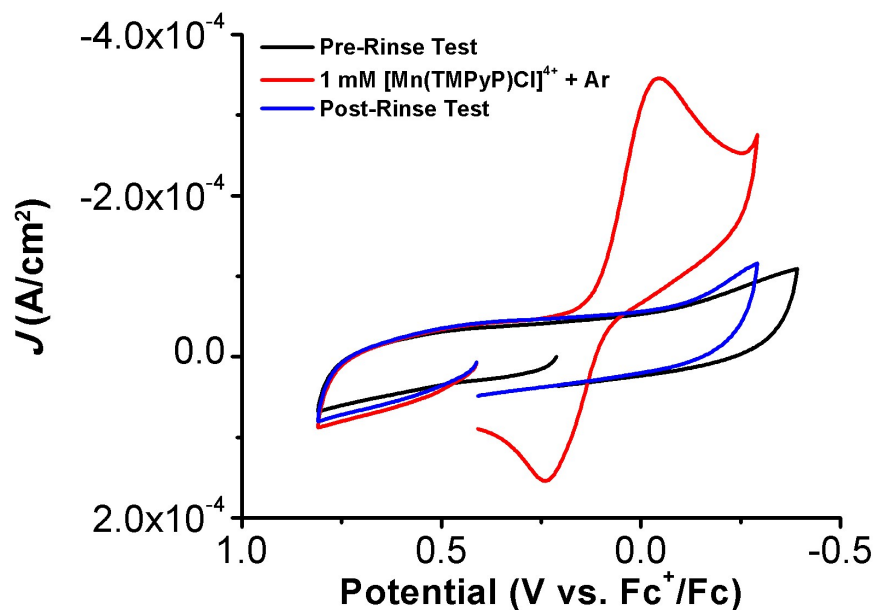

**Figure S50.** Rinse test at pH 1 (1 M HCl / 0.1 M NaCl) solution under Ar. Conditions: Glassy carbon working electrode, glassy carbon counter electrode, 3.0 M NaCl Ag/AgCl reference electrode; scan rate 100 mV/s.

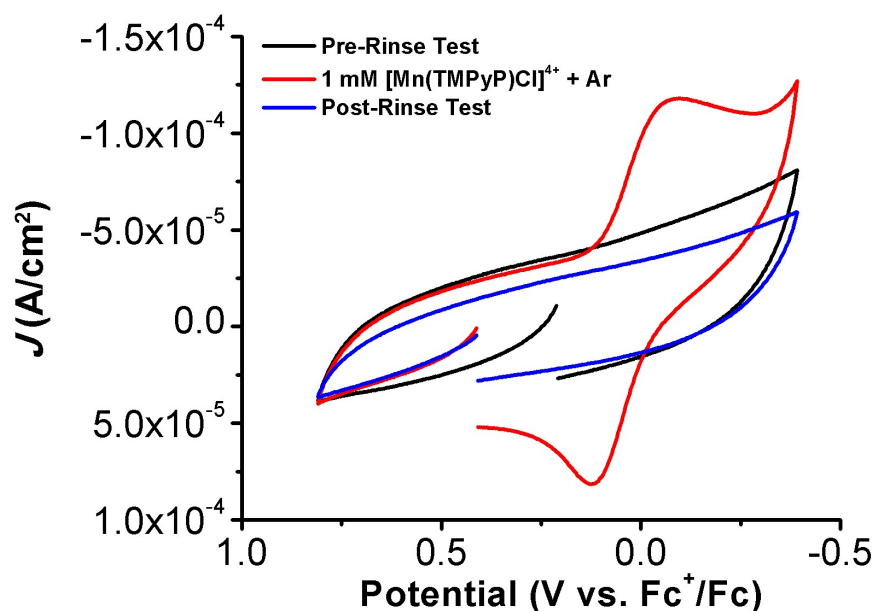

**Figure S51.** Rinse test at pH 3 Britton-Robinson Buffer solution under Ar. Conditions: Glassy carbon working electrode, glassy carbon counter electrode, 3.0 M NaCl Ag/AgCl reference electrode; scan rate 100 mV/s.

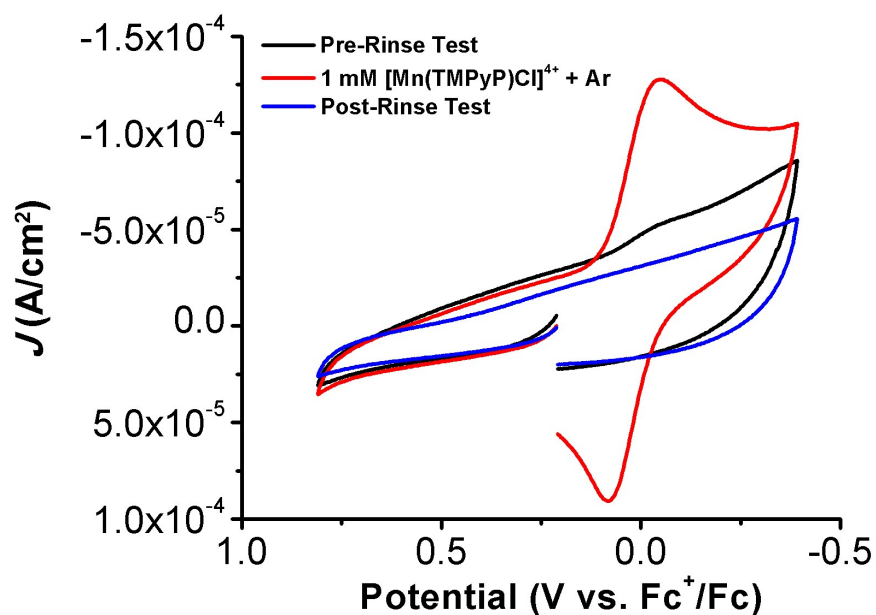

**Figure S52.** Rinse test at pH 6 Britton-Robinson Buffer solution under Ar. Conditions: Glassy carbon working electrode, glassy carbon counter electrode, 3.0 M NaCl Ag/AgCl reference electrode; scan rate 100 mV/s.

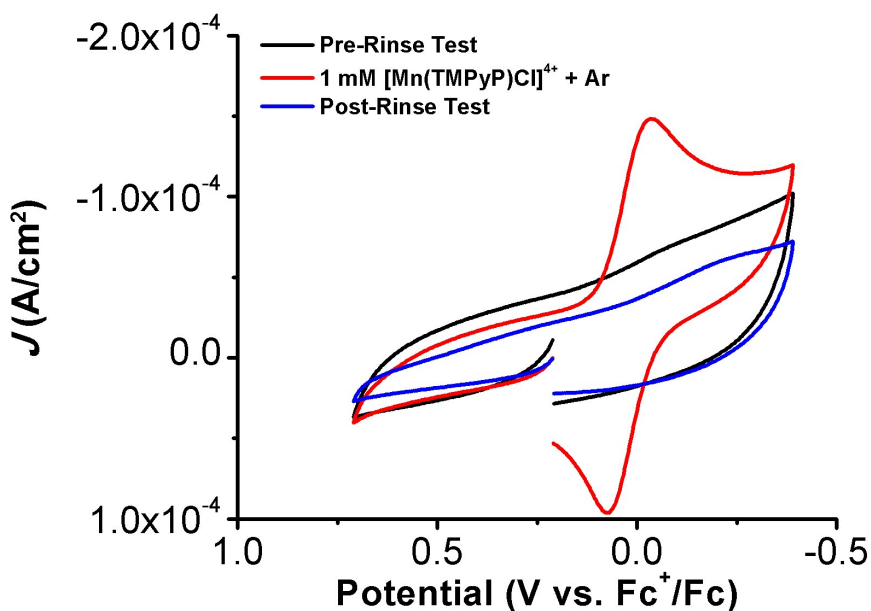

**Figure S53.** Rinse test at pH 7 Britton-Robinson Buffer solution under Ar. Conditions: Glassy carbon working electrode, glassy carbon counter electrode, 3.0 M NaCl Ag/AgCl reference electrode; scan rate 100 mV/s.

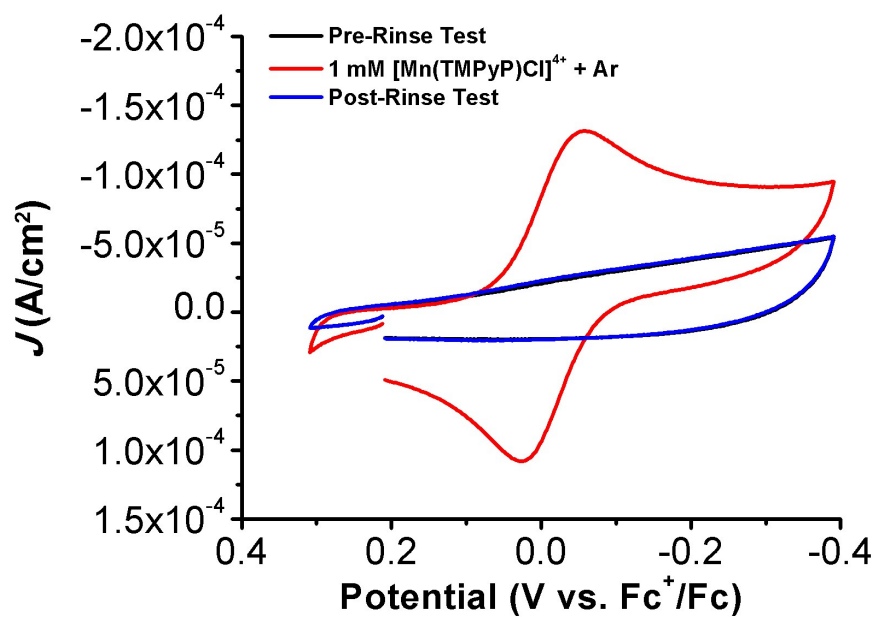

**Figure S54.** Rinse test at pH 12 Britton-Robinson Buffer solution under Ar. Conditions: Glassy carbon working electrode, glassy carbon counter electrode, 3.0 M NaCl Ag/AgCl reference electrode; scan rate 100 mV/s.

## Rotating Ring Disc Electrode (RRDE) Analysis

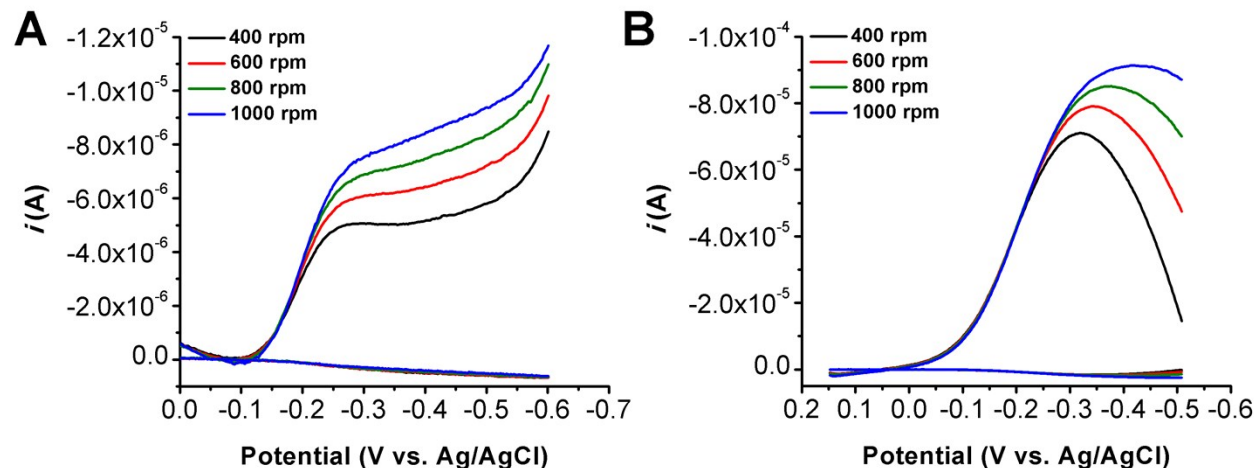

**Figure S55.** Linear Sweep Voltammograms of RRDE experiments with  $[\text{Mn}(\text{TMPyP})\text{Cl}]^{4+}$  (0.25 mM) at various rotation rates under argon (A) and  $\text{O}_2$  (B) saturation conditions in a pH 5 buffer solution; ring potential = 1.2 V vs Ag/AgCl. Conditions: 0.25 mM analyte; glassy carbon working electrode/Pt ring working electrode, glassy carbon counter electrode, Ag/AgCl/3 M KCl reference electrode; scan rate 0.02 V/s.

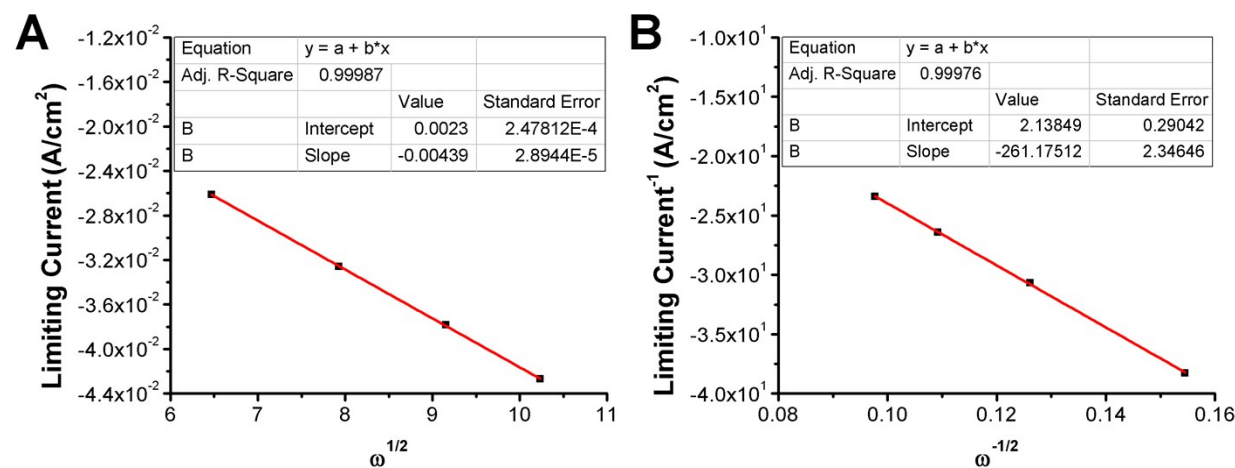

**Figure S56.** Levich (A) and Koutecky-Levich (B) plots from data obtained from Linear Sweep Voltammograms of  $[\text{Mn}(\text{TMPyP})\text{Cl}]^{4+}$  (0.25 mM) by RRDE under argon saturation conditions at various rotation rates in a pH 5 buffer solution.

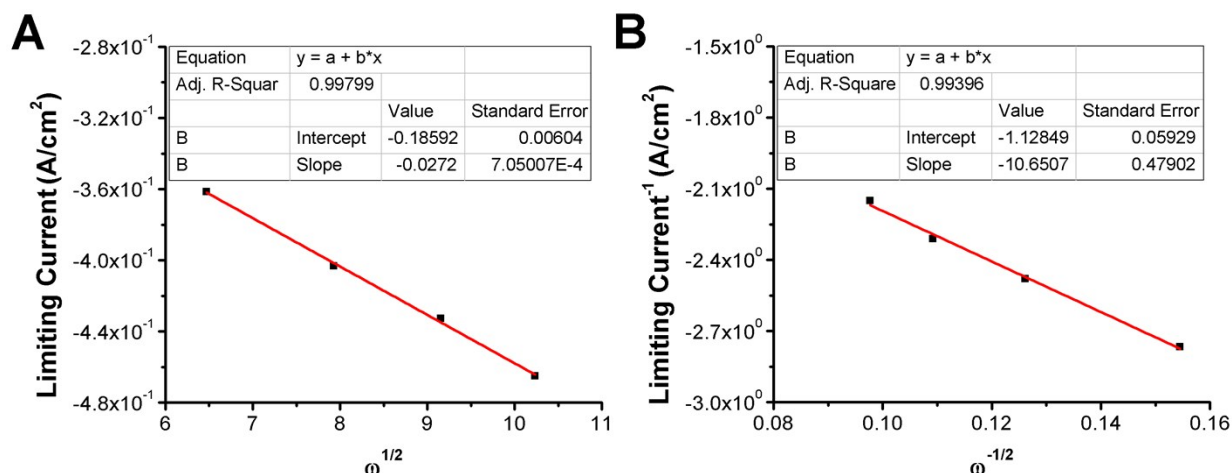

**Figure S57.** Levich (A) and Koutecky-Levich (B) plots from data obtained from Linear Sweep Voltammograms of  $[\text{Mn}(\text{TMPyP})\text{Cl}]^{4+}$  (0.25 mM) by RRDE under  $\text{O}_2$  saturation conditions at various rotation rates in a pH 5 buffer solution.

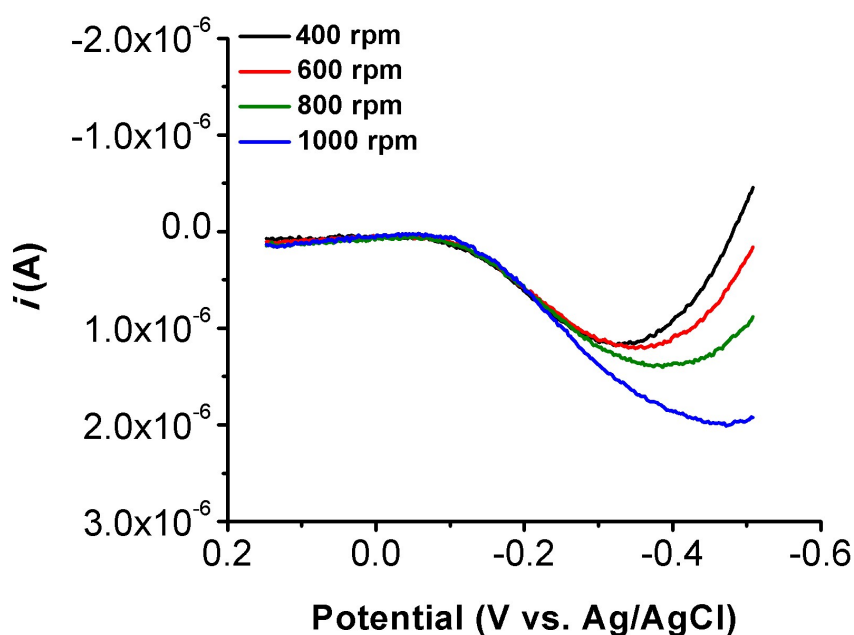

**Figure S58.** Linear Sweep Voltammograms of the generated ring current during RRDE experiments with  $[\text{Mn}(\text{TMPyP})\text{Cl}]^{4+}$  (0.25 mM) at various rotation rates with the argon ring current subtracted from the ring current produced under  $\text{O}_2$  saturation conditions in a pH 5 buffer solution; ring potential = 1.2 V vs Ag/AgCl. Conditions: 0.25 mM analyte; glassy carbon working electrode/Pt ring working electrode, glassy carbon counter electrode, Ag/AgCl/3 M KCl reference electrode; scan rate 0.02 V/s.



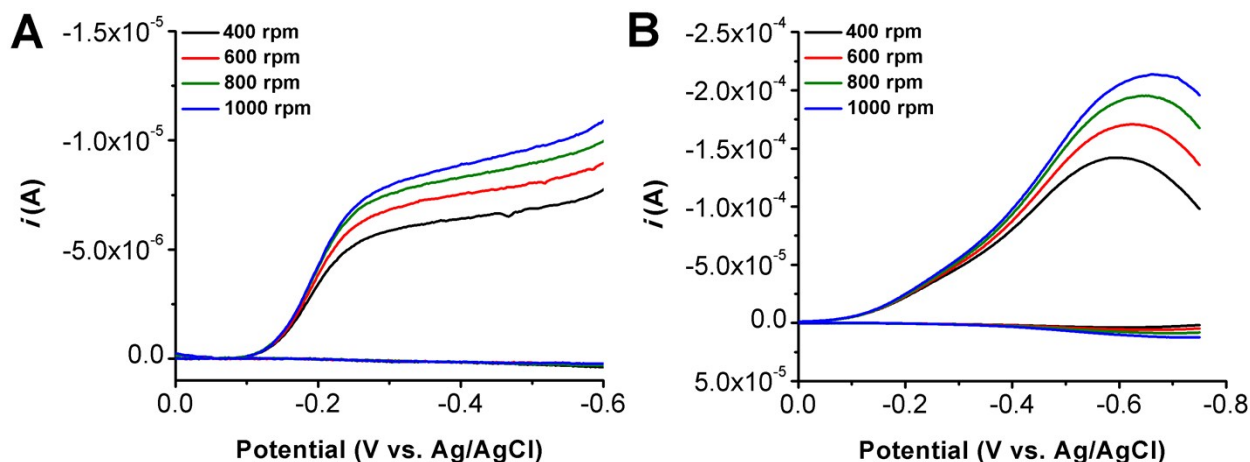

**Figure S59.** Linear Sweep Voltammograms of RRDE experiments with  $[\text{Mn}(\text{TMPyP})\text{Cl}]^{4+}$  (0.25 mM) at various rotation rates under argon (A) and  $\text{O}_2$  (B) saturation conditions in a pH 6 buffer solution; ring potential = 1.2 V vs Ag/AgCl. Conditions: 0.25 mM analyte; glassy carbon working electrode/Pt ring working electrode, glassy carbon counter electrode, Ag/AgCl/3 M KCl reference electrode; scan rate 0.02 V/s.

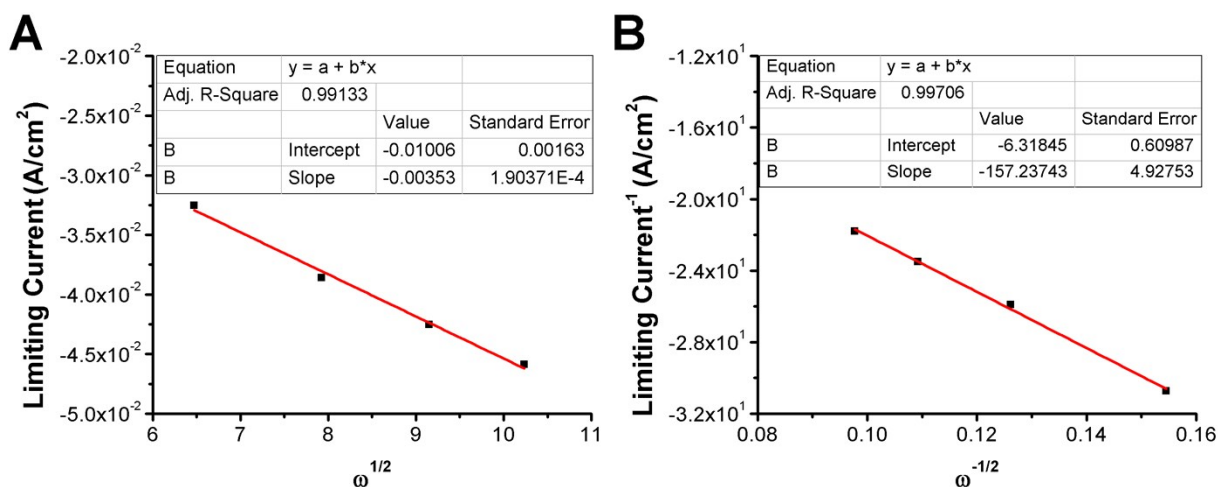

**Figure S60.** Levich (A) and Koutecky-Levich (B) plots from data obtained from Linear Sweep Voltammograms of  $[\text{Mn}(\text{TMPyP})\text{Cl}]^{4+}$  (0.25 mM) by RRDE under argon saturation conditions at various rotation rates in a pH 6 buffer solution.

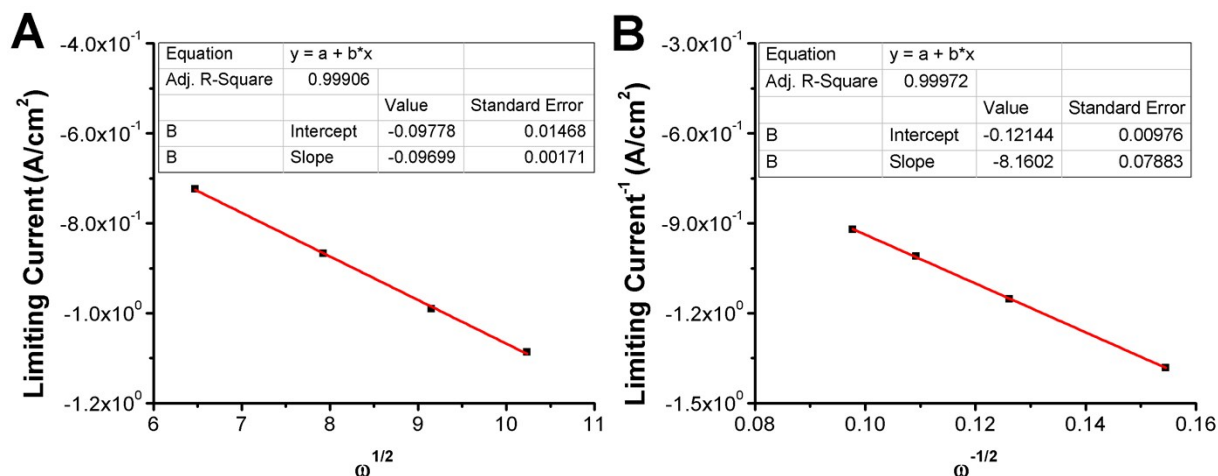

**Figure S61.** Levich (A) and Koutecky-Levich (B) plots from data obtained from Linear Sweep Voltammograms of  $[\text{Mn}(\text{TMPyP})\text{Cl}]^{4+}$  (0.25 mM) by RRDE under  $\text{O}_2$  saturation conditions at various rotation rates in a pH 6 buffer solution.

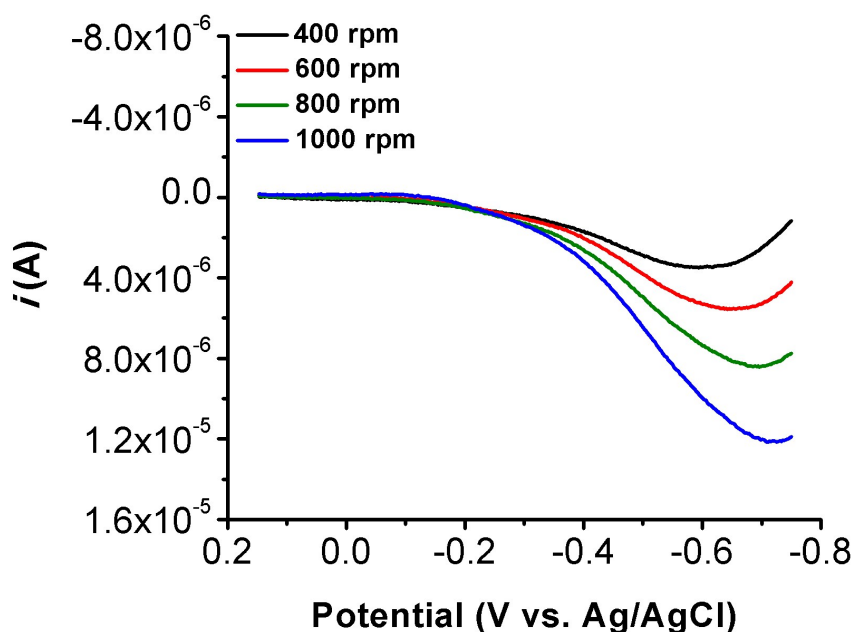

**Figure S62.** Linear Sweep Voltammograms of the generated ring current during RRDE experiments with  $[\text{Mn}(\text{TMPyP})\text{Cl}]^{4+}$  (0.25 mM) at various rotation rates with the argon ring current subtracted from the ring current produced under  $\text{O}_2$  saturation conditions in a pH 6 buffer solution; ring potential = 1.2 V vs Ag/AgCl. Conditions: 0.25 mM analyte; glassy carbon working electrode/Pt ring working electrode, glassy carbon counter electrode, Ag/AgCl/3 M KCl reference electrode; scan rate 0.02 V/s.

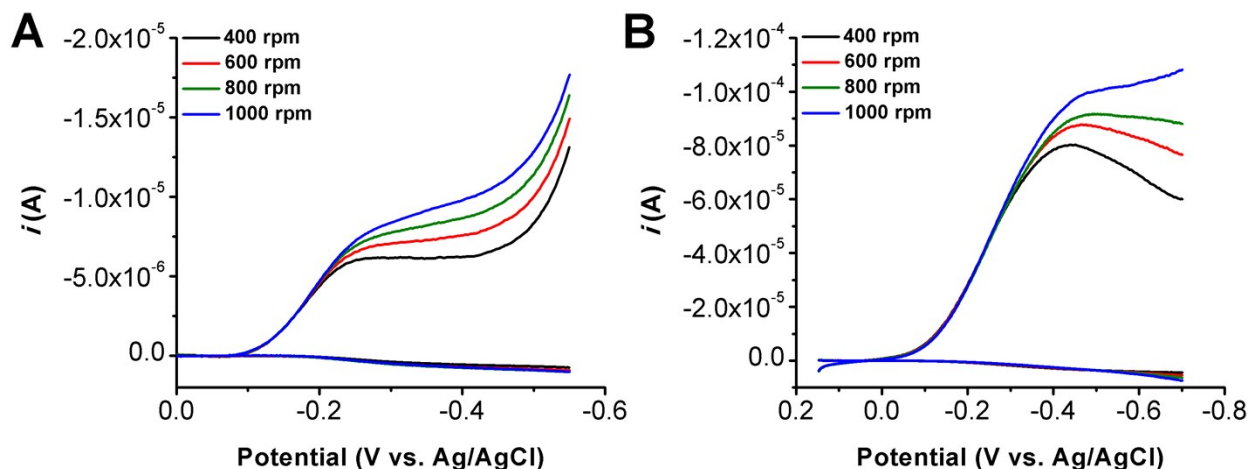

**Figure S63.** Linear Sweep Voltammograms of RRDE experiments with  $[\text{Mn}(\text{TMPyP})\text{Cl}]^{4+}$  (0.25 mM) at various rotation rates under argon (A) and  $\text{O}_2$  (B) saturation conditions in a pH 4 buffer solution; ring potential = 1.2 V vs Ag/AgCl. Conditions: 0.25 mM analyte; glassy carbon working electrode/Pt ring working electrode, glassy carbon counter electrode, Ag/AgCl/3 M KCl reference electrode; scan rate 0.02 V/s.

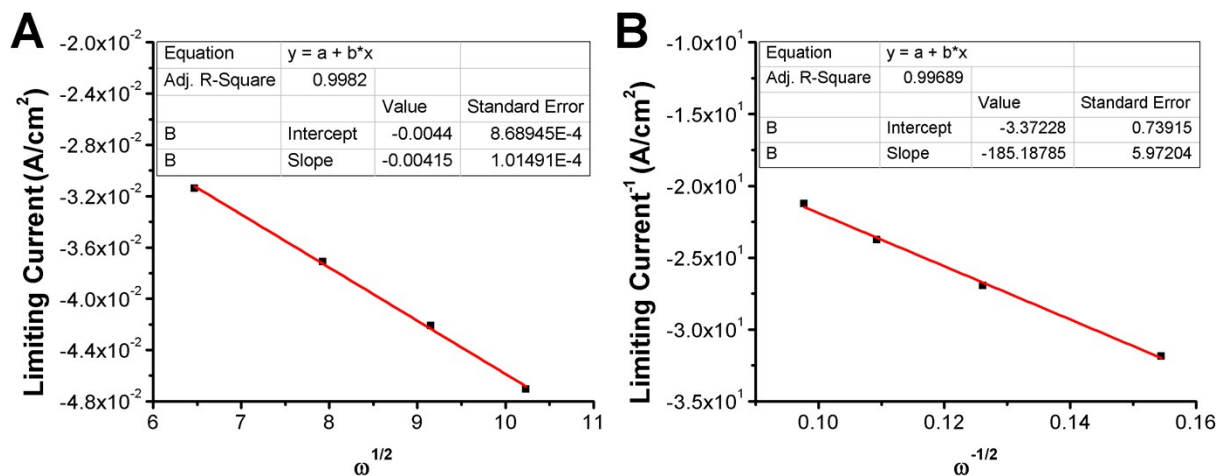

**Figure S64.** Levich (A) and Koutecky-Levich (B) plots from data obtained from Linear Sweep Voltammograms of  $[\text{Mn}(\text{TMPyP})\text{Cl}]^{4+}$  (0.25 mM) by RRDE under argon saturation conditions at various rotation rates in a pH 4 buffer solution.

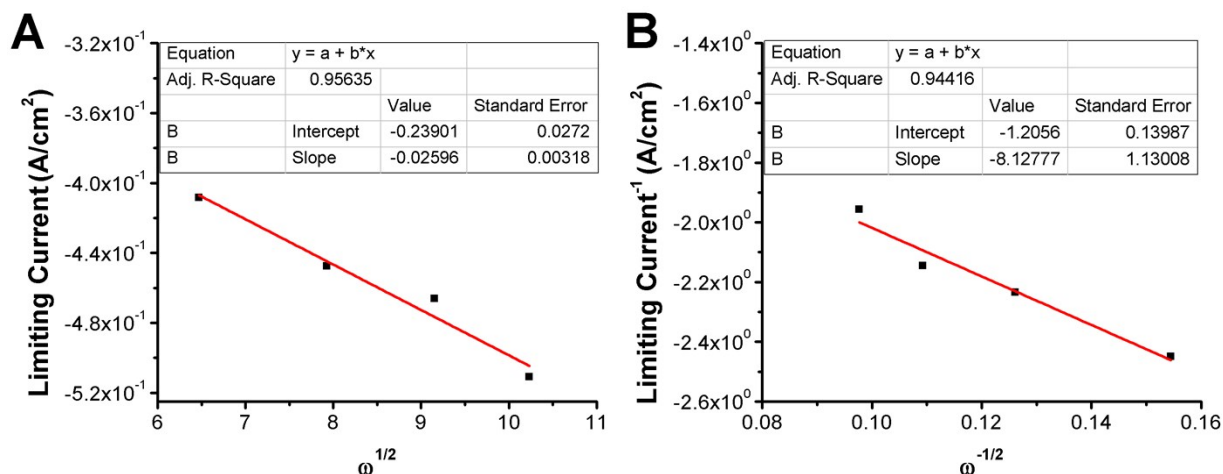

**Figure S65.** Levich (A) and Koutecky-Levich (B) plots from data obtained from Linear Sweep Voltammograms of  $[\text{Mn}(\text{TMPyP})\text{Cl}]^{4+}$  (0.25 mM) by RRDE under  $\text{O}_2$  saturation conditions at various rotation rates in a pH 4 buffer solution.

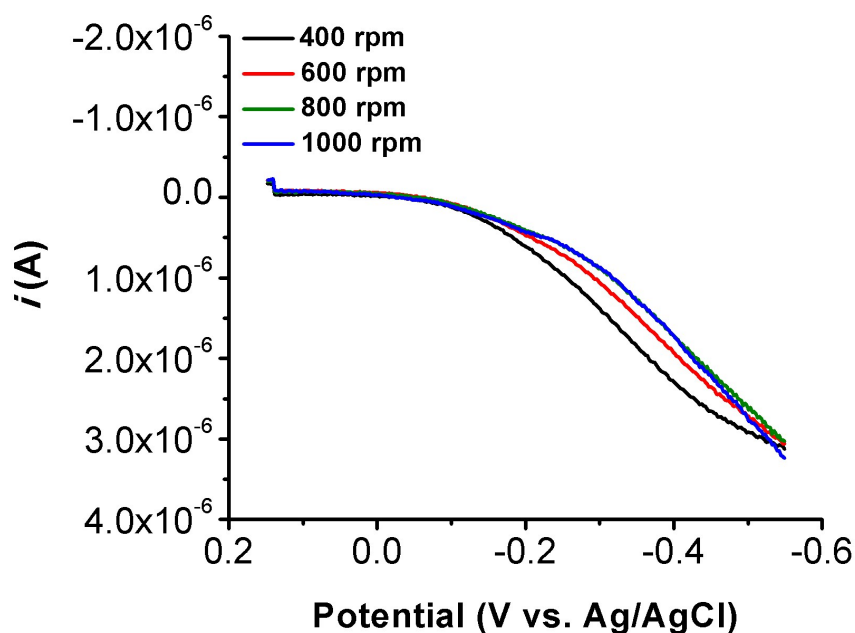

**Figure S66.** Linear Sweep Voltammograms of the generated ring current during RRDE experiments with  $[\text{Mn}(\text{TMPyP})\text{Cl}]^{4+}$  (0.25 mM) at various rotation rates with the argon ring current subtracted from the ring current produced under  $\text{O}_2$  saturation conditions in a pH 4 buffer solution; ring potential = 1.2 V vs Ag/AgCl. Conditions: 0.25 mM analyte; glassy carbon working electrode/Pt ring working electrode, glassy carbon counter electrode, Ag/AgCl/3 M KCl reference electrode; scan rate 0.02 V/s.

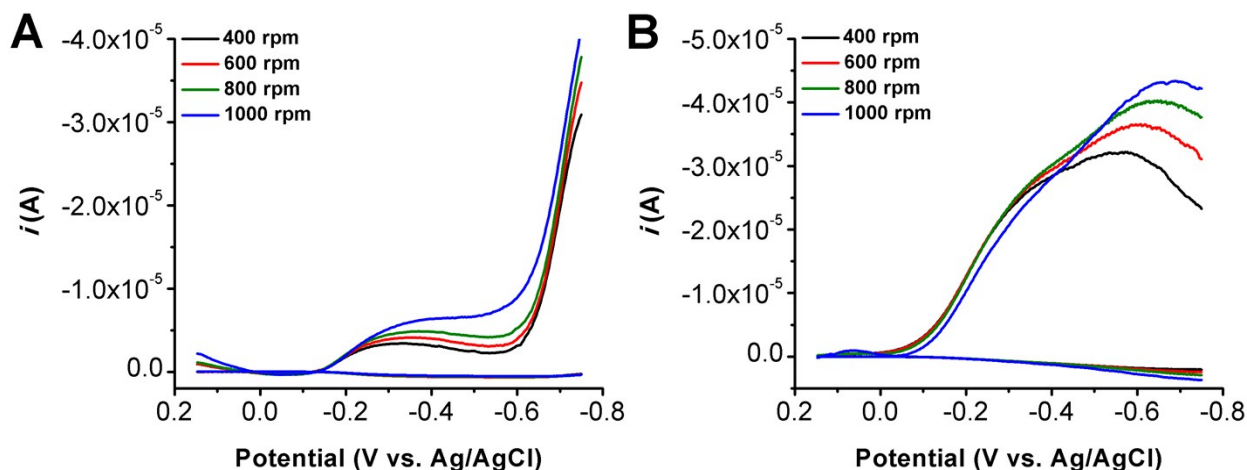

**Figure S67.** Linear Sweep Voltammograms of RRDE experiments with  $[\text{Mn}(\text{TMPyP})\text{Cl}]^{4+}$  (0.25 mM) at various rotation rates under argon (A) and  $\text{O}_2$  (B) saturation conditions in a pH 3 buffer solution; ring potential = 1.2 V vs Ag/AgCl. Conditions: 0.25 mM analyte; glassy carbon working electrode/Pt ring working electrode, glassy carbon counter electrode, Ag/AgCl/3 M KCl reference electrode; scan rate 0.02 V/s.

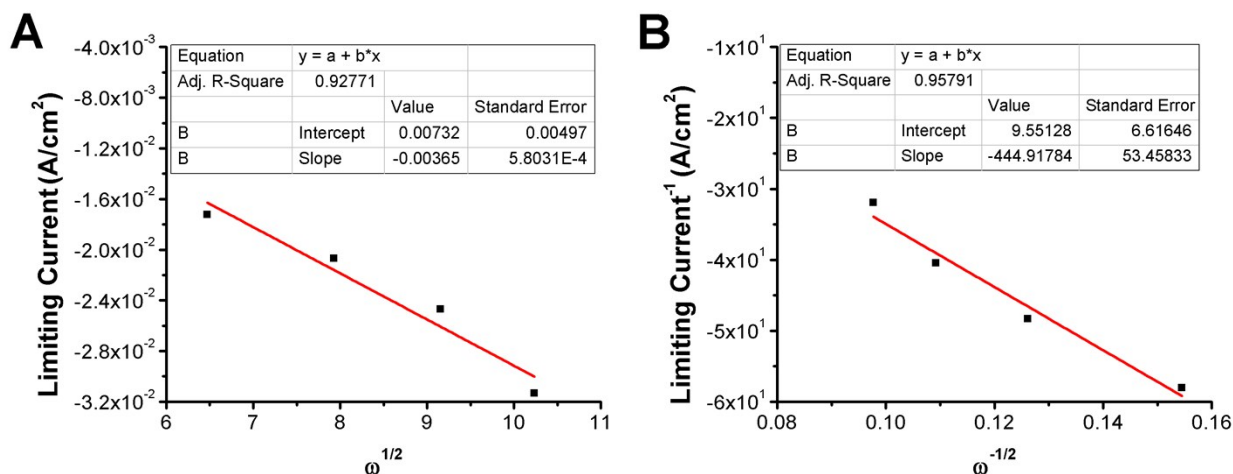

**Figure S68.** Levich (A) and Koutecky-Levich (B) plots from data obtained from Linear Sweep Voltammograms of  $[\text{Mn}(\text{TMPyP})\text{Cl}]^{4+}$  (0.25 mM) by RRDE under argon saturation conditions at various rotation rates in a pH 3 buffer solution.

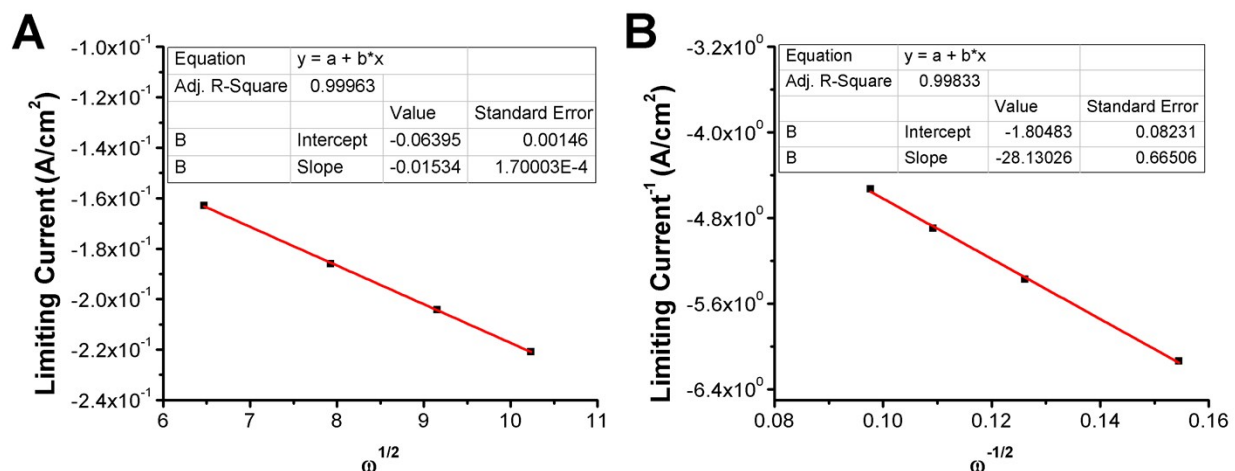

**Figure S69.** Levich (A) and Koutecky-Levich (B) plots from data obtained from Linear Sweep Voltammograms of  $[\text{Mn}(\text{TMPyP})\text{Cl}]^{4+}$  (0.25 mM) by RRDE under  $\text{O}_2$  saturation conditions at various rotation rates in a pH 3 buffer solution.

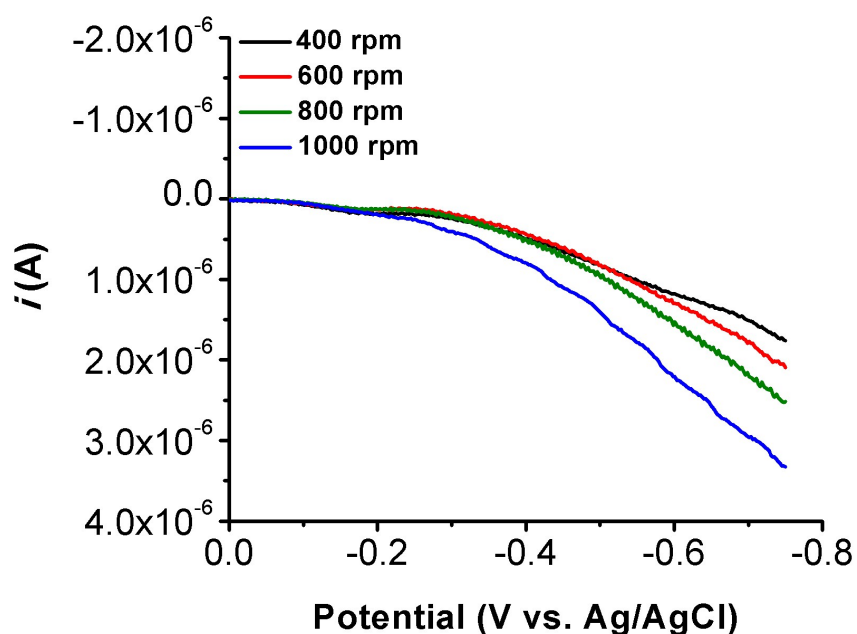

**Figure S70.** Linear Sweep Voltammograms of the generated ring current during RRDE experiments with  $[\text{Mn}(\text{TMPyP})\text{Cl}]^{4+}$  (0.25 mM) at various rotation rates with the argon ring current subtracted from the ring current produced under  $\text{O}_2$  saturation conditions in a pH 3 buffer solution; ring potential = 1.2 V vs Ag/AgCl. Conditions: 0.25 mM analyte; glassy carbon working electrode/Pt ring working electrode, glassy carbon counter electrode, Ag/AgCl/3 M KCl reference electrode; scan rate 0.02 V/s.

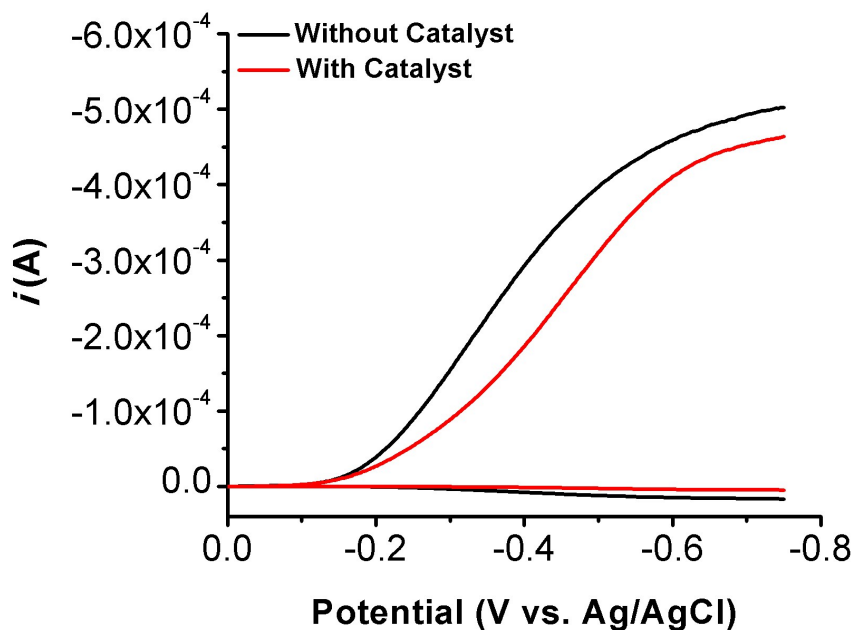

**Figure S71.** Linear Sweep Voltammograms of RRDE experiments with  $[\text{Mn}(\text{TMPyP})\text{Cl}]^{4+}$  (0.25 mM) at 1000 rpm under  $\text{O}_2$  saturation conditions in a pH 7 buffer solution illustrating the inability to perform RRDE analysis above pH 6 due to the greater background disk and ring current observed at pH 7; ring potential = 1.2 V vs Ag/AgCl. Conditions: 0.25 mM analyte; glassy carbon working electrode/Pt ring working electrode, glassy carbon counter electrode, Ag/AgCl/3 M KCl reference electrode; scan rate 0.02 V/s.

**Table S16.** %H<sub>2</sub>O<sub>2</sub> calculated from RRDE experiments at various pH values.

| <b>pH</b> | <b>Rotation Rate (rpm)</b> | <b>%H<sub>2</sub>O<sub>2</sub></b> | <b>Average %H<sub>2</sub>O<sub>2</sub></b> |
|-----------|----------------------------|------------------------------------|--------------------------------------------|
| 3         | 400                        | 16.2                               |                                            |
|           | 600                        | 15.4                               |                                            |
|           | 800                        | 17.4                               |                                            |
|           | 1000                       | 23.7                               | 18 (±4)                                    |
| 4         | 400                        | 14.0                               |                                            |
|           | 600                        | 11.4                               |                                            |
|           | 800                        | 10.4                               |                                            |
|           | 1000                       | 9.45                               | 11 (±2)                                    |
| 5         | 400                        | 6.71                               |                                            |
|           | 600                        | 6.14                               |                                            |
|           | 800                        | 6.77                               |                                            |
|           | 1000                       | 8.96                               | 7 (±1)                                     |
| 6         | 400                        | 9.64                               |                                            |
|           | 600                        | 12.8                               |                                            |
|           | 800                        | 16.9                               |                                            |
|           | 1000                       | 22.3                               | 15 (±5)                                    |



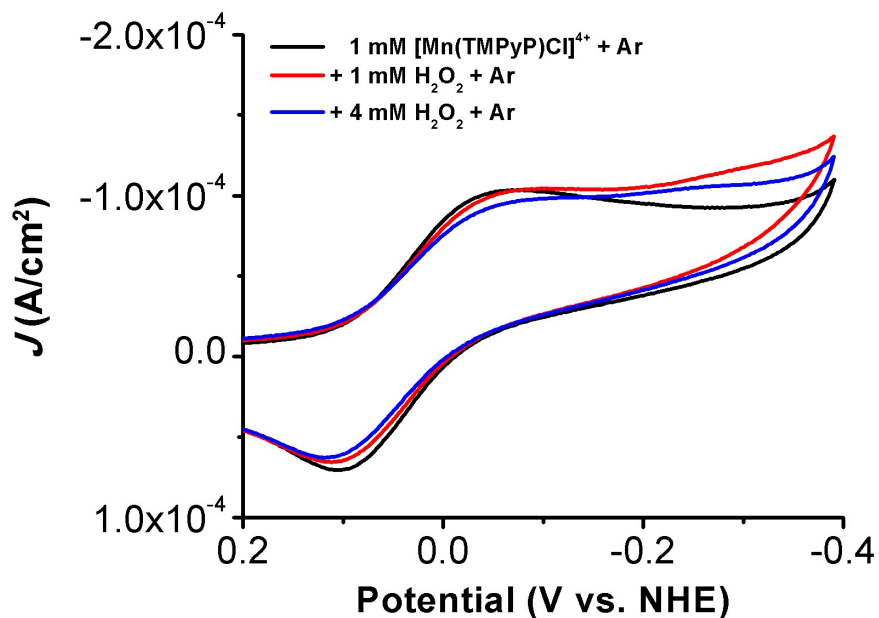

**Figure S72.** Control CV of 1 mM  $[\text{Mn}(\text{TMPyP})\text{Cl}]^{4+}$  with 1 mM  $\text{H}_2\text{O}_2$  (red trace) and 4 mM  $\text{H}_2\text{O}_2$  (blue trace) to show catalytic response for the dismutase of  $\text{H}_2\text{O}_2$  in a pH 3 Britton-Robinson Buffer. Conditions: Glassy carbon working electrode, glassy carbon counter electrode, 3.0 M NaCl Ag/AgCl reference electrode; scan rate 100 mV/s.

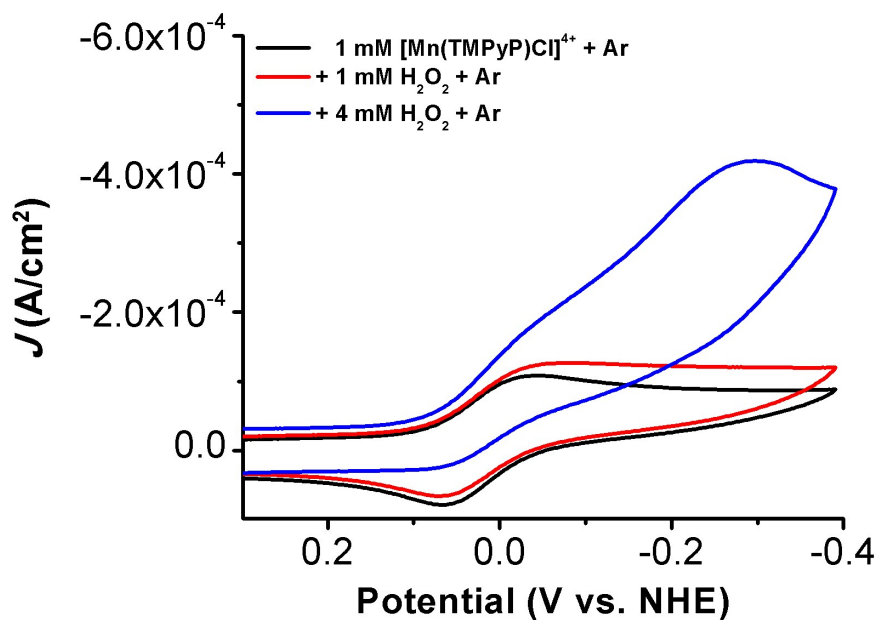

**Figure S73.** Control CV of 1 mM  $[\text{Mn}(\text{TMPyP})\text{Cl}]^{4+}$  with 1 mM  $\text{H}_2\text{O}_2$  (red trace) and 4 mM  $\text{H}_2\text{O}_2$  (blue trace) to show catalytic response for the dismutase of  $\text{H}_2\text{O}_2$  in a pH 6 Britton-Robinson

Buffer. Conditions: Glassy carbon working electrode, glassy carbon counter electrode, 3.0 M NaCl Ag/AgCl reference electrode; scan rate 100 mV/s.

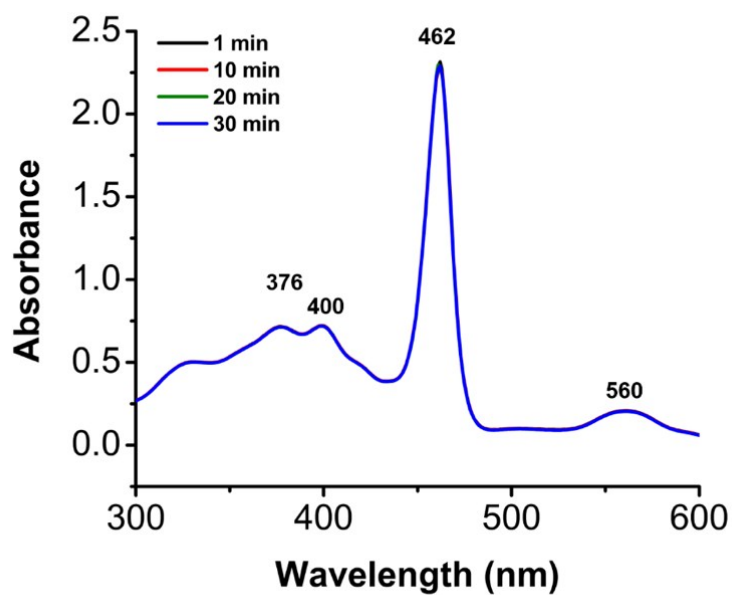

**Figure S74.** Control UV-Vis of  $1.5 \times 10^{-5}$  M  $[\text{Mn}(\text{TMPyP})\text{Cl}]^{4+}$  and  $5.0 \times 10^{-5}$  M  $\text{H}_2\text{O}_2$  in pH 3 Britton-Robinson buffer.

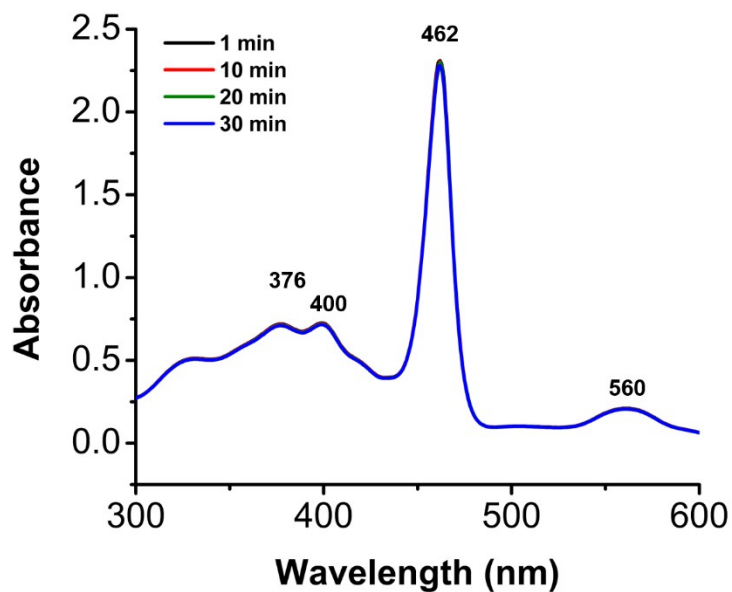

**Figure S75.** Control UV-Vis of  $1.5 \times 10^{-5}$  M  $[\text{Mn}(\text{TMPyP})\text{Cl}]^{4+}$  and  $5.0 \times 10^{-5}$  M  $\text{H}_2\text{O}_2$  in pH 6 Britton-Robinson buffer.

## References

1. Britton, H. T. S.; Robinson, R. A., CXCVIII.—Universal buffer solutions and the dissociation constant of veronal. *J. Chem. Soc.* **1931**, (0), 1456-1462.
